1 **IL-7 is essential for accumulation of antigen-specific CD8 T cells and to generate**  
2 **clonotype-specific effector responses during airway influenza/A infection**

3 <sup>1,2</sup> Abdalla Sheikh, <sup>1,2</sup> Jennie Jackson, <sup>1,2,3</sup> Hanjoo Brian Shim, <sup>1,2,4</sup> Clement Yau, <sup>1,2</sup> Jung  
4 Hee Seo, <sup>1,2,5</sup> Ninan Abraham

5 <sup>1</sup> Department of Microbiology and Immunology, University of British Columbia,  
6 Vancouver, Canada

7 <sup>2</sup> Life Sciences Institute, University of British Columbia, Vancouver, Canada

8 <sup>3</sup> Current address: Calvin, Phoebe and Joan Snyder Institute for Chronic Diseases,  
9 University of Calgary, Alberta, Canada

10 <sup>4</sup> Current address: Duke-NUS Medical School, 8 College Road, Singapore

11 <sup>5</sup> Department of Zoology, University of British Columbia, Vancouver, Canada

12 Corresponding author: Ninan Abraham ([ninan@mail.ubc.ca](mailto:ninan@mail.ubc.ca))

13

14

15

16

17

18

19

20 **Abstract** (275 word count)

21 Airborne diseases are the leading cause of infectious disease-related deaths in the  
22 world. In particular, the influenza virus activates a network of immune cells that leads to  
23 clearance or an overzealous response that can be fatal. Tight regulation of the  
24 cytokines that enable proper activation and function of immune cells is necessary to  
25 clear infections efficiently while minimizing damage to the host. Interleukin-7 (IL-7) is a  
26 cytokine known for its importance in T cell development and survival. How IL-7 shapes  
27 CD8 T cell responses during an acute viral infection is less understood. We had  
28 previously shown that IL-7 signaling deficient mice have reduced accumulation of  
29 influenza-specific CD8 T cells following infection. We sought to determine whether IL-7  
30 affects early CD8 T cell expansion in the mediastinal lymph node and effector function  
31 in the lungs. Using IL-7R $\alpha$  signaling deficient mice, we show that IL-7 is required for a  
32 normal sized mediastinal lymph node and the early clonal expansion of antigen-specific  
33 CD8 T cells therein. Bone marrow chimeric models and adoptive transfer of transgenic  
34 TCR CD8 T cells reveal a cell-intrinsic role for IL-7 in the accumulation of NP<sub>366-374</sub> and  
35 PA<sub>224-233</sub>-specific CD8 T cells. We also found that IL-7 dictates terminal differentiation,  
36 degranulation and cytokine production in PA<sub>224-233</sub>-specific but not NP<sub>366-374</sub>-specific  
37 CD8 T cells. We further demonstrate that IL-7 is induced in the lung tissue by viral  
38 infection and we characterize multiple cellular sources that contribute to IL-7 production.  
39 Drugs that manipulate IL-7 signaling are currently under clinical trial for multiple  
40 conditions. Our findings on IL-7 and its effects on lower respiratory diseases will be  
41 important for expanding the utility of these therapeutics.

42

## 43 **Author Summary**

44 Interleukin-7 plays an important role in development of immune cells such as  
45 lymphocytes. In recent years, its role in the immune system has been expanded beyond  
46 the development of immune cells to include revitalizing of lymphocytes during tumor and  
47 chronic viral response. We show here that IL-7 is required for accumulation and function  
48 of specialized lymphocytes in the lungs during an acute influenza infection.

49

50

51

52

53

54

55

56

57

58

59

60

## 61 **Introduction**

62           The influenza virus is an airway pathogen that infects lung epithelial cells and  
63 activates a network of immune cells. It causes seasonal and pandemic outbreaks with  
64 major global health and economic impacts. Seasonal variants of influenza can cause  
65 death in children, the elderly and immune-compromised individuals (1). Vaccination is a  
66 cornerstone of the preventative measures taken towards influenza as it arms the  
67 adaptive immune system. Multiple cell types in the immune system are required during  
68 a response to influenza infection. However, we lack a complete understanding of the  
69 cellular aspects and intercellular signaling components that lead to efficient generation  
70 of functionally competent immune cells. At the center of immune responses are the  
71 cytokine signals that shape various aspects of immune cells (2).

72           A hallmark of our immune response is its ability to develop memory to previously  
73 encountered pathogens – T cells are major players in this process. An ideal anti-viral  
74 response to influenza and other viruses, requires cytotoxic CD8 T cells for their swift  
75 and specific response. CD8 T cells employ multiple methods to kill infected cells and  
76 control viral replication, namely, granule-dependent (granzyme B and perforin) and  
77 ligand-dependent (Fas-FasL) means (3).

78           In addition to TCR-MHC engagement (signal 1) and co-stimulation (signal 2),  
79 cytokine cues (signal 3) have great influence in activating and shaping CD8 T cell  
80 responses and their terminal differentiation. Once a CD8 T cell receives these signals, it  
81 is driven towards a robust clonal expansion phase whereby a single cell expands to  
82  $\sim 10^5$  cells (4). The signal 3 cytokines that govern T cells are multifaceted and include

83 interleukin-2 (IL-2), IL-6, IL-10, IL-12, IL-15 and others which dictate their terminal  
84 differentiation and inflammatory functions (5, 6).

85         The common gamma chain ( $\gamma_c$ ) cytokine IL-7 is produced mainly by stromal cells  
86 in the bone marrow and thymus. At steady state, it plays an indispensable role in the  
87 development of both pre- and pro- B cells and T cells (7-10). IL-7 is important in the  
88 development and survival of T cells at specific stages of maturation in the thymus as the  
89 expression of IL-7R $\alpha$  (CD127) is dynamically regulated (8, 11-13). IL-7 shares the IL-  
90 7R $\alpha$  with thymic stromal lymphopoietin (TSLP), an alarmin cytokine that plays a major  
91 role in mucosal sites. In addition to its role in development, IL-7 also plays a canonical  
92 role in maintenance of memory T cells (14). The span of IL-7's function was further  
93 expanded in the past decade when it was shown to be able to shape the effector  
94 responses of cytotoxic CD8 T cells by enhancing their responses against tumors (15)  
95 and bacterial infection (14), and reverse T cell exhaustion caused by chronic LCMV  
96 infection, thus, preventing liver pathology (16). However, the extent to which IL-7  
97 regulates CD8 T cell response to acute viral infections is unknown. We had previously  
98 shown that IL-7 but not TSLP is important for the accumulation of influenza-specific  
99 CD8 T cells in the lungs but the mechanism by which this occurs is unclear (17). Since  
100 IL-7 is implicated in over 8 clinical trials for treatment of infections, solid tumors and  
101 other chronic conditions, the intricacies of IL-7 signaling in functional outcomes requires  
102 further inquiry (18).

103         In this study, we asked: what modulatory effects does IL-7 have on CD8 T cell  
104 priming and effector functions during an acute airway influenza infection? Using IL-7R $\alpha$   
105 knock-in mice, we have shown that in the lung draining mediastinal LNs (mdLNs), IL-7

106 is important for early priming and accumulation of CD8 T cells specific for influenza  
107 NP<sub>366-374</sub> and PA<sub>224-233</sub> presented on H2D<sup>b</sup> in a cell intrinsic manner. We also show that  
108 IL-7 is important for the terminal differentiation and cytokine production in CD8 T cells.  
109 This study will aid in therapeutic development and vaccine adjuvant studies to design  
110 combinatorial therapeutic strategies.

111

112

113

114

115

116

117

118

119

120

121

122

123

124

## 125 **Results**

### 126 **IL-7R $\alpha$ signaling is required for accumulation of influenza-specific CD8 T cells**

127 To assess the importance of IL-7 signaling in CD8 T cells following infection with  
128 influenza, we infected WT and IL-7R $\alpha$ <sup>449F</sup> mice with A/PR/8/34 (PR8) influenza virus  
129 and measured influenza-specific CD8 T cells by flow cytometry using MHC-I tetramers.  
130 We found that IL-7R $\alpha$ <sup>449F</sup> mice have reduced proportions of NP<sub>366-374</sub> and PA<sub>224-233</sub>-  
131 specific cells within CD8 T cells in the lungs 7 days post-infection (dpi) (Fig. 1a), which  
132 phenocopies past observation of this defect at 9 dpi in a new, embryo re-derivation  
133 based, specific pathogen free facility (17). Since the majority of pathogen-specific T  
134 cells originate from tissue draining lymph nodes, we examined the mediastinal lymph  
135 nodes (mdLNs) of infected mice and found that IL-7R $\alpha$ <sup>449F</sup> mice have reduced lymph  
136 node sizes, particularly the mdLN, compared to WT mice. Interestingly, unlike WT mice,  
137 there was little increase in mdLN size of IL-7R $\alpha$ <sup>449F</sup> mice after influenza infection (Fig.  
138 1b). Additionally, enumeration of the total antigen-specific cells in the mdLN at multiple  
139 days post infection revealed a consistent and substantial defect that is not due to a  
140 delay in expansion kinetics. (Fig. 1c). Consistent with lack of LN hyperplasia, the  
141 proportion of antigen-specific cells in IL-7R $\alpha$ <sup>449F</sup> mdLN at 5 dpi was reduced indicating a  
142 defect in early priming of CD8 T cells (Fig. 1d).

143

144 **Intrinsic requirement for IL-7R $\alpha$  signaling in the accumulation of influenza-**  
145 **specific CD8 T cells in the mdLN**

146 Previous reports have shown that IL-7 is required for the generation of lymph  
147 nodes independent of the peripheral lymphocyte pool (19, 20). This likely contributed to  
148 the reduced lymph node sizes noted above. Therefore, it is possible that the reduction  
149 in influenza-specific CD8 T cell accumulation was due to factors extrinsic to T cells in  
150 the lymph node and that IL-7 was indirectly important for shaping the cellular and  
151 cytokine environment for optimal T cell activation. To address this, we created bone  
152 marrow (BM) chimeric mice whereby we grafted BM cells of wild type (WT) and IL-  
153 7R $\alpha^{449F}$  mice into lethally irradiated RAG-1-deficient hosts (Fig. 2a). Since WT  
154 lymphocytes outcompete IL-7R $\alpha^{449F}$  lymphocytes during development (21), we  
155 delivered a 1 to 10 ratio of WT to IL-7R $\alpha^{449F}$  cells respectively. Following engraftment  
156 and infection of the hosts, we noted a reversal of this ratio within the CD8 T cell  
157 compartment in the mdLN (Fig. 2b). More importantly, IL-7R $\alpha^{449F}$  CD8 T cells resulted in  
158 reduced NP<sub>366-374</sub> and PA<sub>224-233</sub> - specific cells in proportion despite engraftment in a  
159 competent niche (Fig. 2b). These data suggest that IL-7R $\alpha$  signaling plays an intrinsic  
160 role necessary for CD8 T cell expansion during influenza infection.

161

162 **IL-7R $\alpha$  plays a role in early priming of CD8 T cells independent of TCR and**  
163 **number of naïve precursors in the mdLN**

164 To determine if the reduction in pathogen-specific CD8 T cells was due to  
165 reduced numbers of naïve precursors or a result of gaps in TCR repertoire, we



166 adoptively transferred SIINFEKL OVA peptide-specific and MHCI restricted transgenic  
167 TCR CD8 T cells from OT-I mice crossed with IL-7R $\alpha^{449F}$  mice (CD45.2) in to BoyJ mice  
168 (CD45.1). We infected these mice with a modified version of the influenza PR8 virus  
169 that has the OVA (SIINFEKL) peptide inserted into the stalk of the NP polypeptide  
170 (influenza PR8-OVA). Despite delivering equal number ( $1 \times 10^6$ ) of OT-I and OT-I;IL-  
171 7R $\alpha^{449F}$  CD8 T cells into distinct BoyJ (CD45.1) hosts, OT-I;IL-7R $\alpha^{449F}$  CD8 T cells did  
172 not expand to the same extent as wild type OT-I CD8 T cells 4 dpi (Fig. 3a) in the  
173 mdLN. This defect was observed as early as 3 dpi (Suppl. Fig. 1). Interestingly, the  
174 expression of the early activation marker CD5 at 4 dpi was significantly reduced in OT-  
175 I;IL-7R $\alpha^{449F}$  CD8 T cells indicating a defect in priming (Fig. 3b and c). Furthermore, TCR  
176 expression on OT-I;IL-7R $\alpha^{449F}$  CD8 T cells showed a trend towards higher expression at  
177 4 dpi albeit not significantly, further suggesting a possible defect in early priming (Fig.  
178 3b and c).

179

### 180 **Increased dendritic cell accumulation in the lungs of IL-7R $\alpha^{449F}$ mice**

181 Evidence of IL-7 cell-intrinsic effects on CD8 T cells does not exclude cell-  
182 extrinsic effects. Antigen presenting cells, specifically dendritic cells (DCs) are key to  
183 activation of CD8 T cells and their subsequent response. Previous reports have  
184 demonstrated that IL-7R $\alpha$  signaling plays an indirect role in the development of  
185 conventional DCs (22). Furthermore, IL-7 has been shown to regulate CD4 T cell  
186 proliferation in conditions of lymphopenia indirectly through DCs (23). We found that in  
187 the lungs of IL-7R $\alpha^{449F}$  mice, CD11b $^+$  CD103 $^-$  DCs but not CD11b $^-$  CD103 $^+$  DCs,  
188 accumulate up to 9 dpi, while in WT mice these DCs peak at 7 dpi and decrease in

189 numbers at 9 dpi (Suppl. Fig. 2a). This increased accumulation could be due to a cell-  
190 extrinsic factors such as increased viral load in the IL-7R $\alpha^{449F}$  mice as a result of lack of  
191 appropriate T cell response. Another plausible reason could be due to impaired lymph  
192 node homing signals from chemokines as a result of reduced draining lymph node size.  
193 Alternatively, IL-7 may have a direct effect on CD11b<sup>+</sup> CD103<sup>-</sup> DC maturation or  
194 migration. To test these hypotheses, we created 50:50 BM chimeras using WT:IL-  
195 7R $\alpha^{449F}$  or WT:WT BM cells (CD45.1:CD45.2) grafted into congenic BoyJ/WT hosts  
196 (CD45.1/2). We found that after infection, WT:IL-7R $\alpha^{449F}$  ratios of DC subsets were  
197 comparable to WT:WT ratios in both the mdLN and lungs for both DC subsets (Suppl.  
198 Fig. 2b and c). This suggests that the phenotypic elevation of DCs in IL-7R $\alpha^{449F}$  mice  
199 during influenza infection has a cell extrinsic cause.

200

## 201 **IL-7 is inducible in lung tissues in response to influenza**

202 IL-7 is mainly produced by radio-resistant cells such as stromal and epithelial  
203 cells of the bone marrow and thymus, where it plays a major role in hematopoiesis and  
204 thymopoiesis (10, 24). A few studies have demonstrated IL-7 expression in various  
205 tissues including liver, skin, intestines and lungs (25-29). While IL-7 is mainly produced  
206 in steady state lungs by lymphatic endothelial cells, its source during inflammation is  
207 unclear (30, 31). To assess IL-7 expression dynamics in response to influenza, we first  
208 infected human type II epithelial cells (A549) with influenza and assessed *Il7* mRNA  
209 using qRT-PCR. We found that IL-7 expression is induced within 24h following influenza  
210 infection correlating with the antiviral response signified by IFN- $\beta$  and viral replication  
211 demonstrated by M1 mRNA transcript expression (Fig. 4a).

212 To determine if IL-7 is induced *in vivo*, we used the IL-7<sup>eGFP/WT</sup> mice. We noted  
213 an increase in the number of cells expressing eGFP at 6 dpi (Fig. 4b). Interestingly, the  
214 majority of IL-7-eGFP<sup>+</sup> cells during infection are epithelial cells. The number of IL-7-  
215 eGFP<sup>+</sup> stromal cells also significantly increased during infection. However, IL-7-eGFP<sup>+</sup>  
216 lymphatic endothelial cells were reduced following infection (Fig. 4b). Altogether, these  
217 *in vitro* and *in vivo* experiments suggest that lung epithelial cells are responsive to viral  
218 infection, and that during influenza infection, they become the primary source of IL-7.

219

#### 220 **IL-7R $\alpha$ <sup>449F</sup> CD8 T cells have reduced terminal differentiation**

221 The cytokine milieu that CD8 T cells are exposed to throughout the course of an  
222 immune response governs their terminal differentiation to effector cells and hence, their  
223 functional capabilities. Among the heterogeneous population of CD8 T cells that emerge  
224 during the expansion phase are the T-bet<sup>hi</sup> and granzyme B producing short-lived  
225 effector cells (SLECs) that are identified by their expression of the killer cell lectin-like  
226 receptor G1 (KLRG1) and low CD127 (IL-7R $\alpha$ ) (6, 32). Due to extra-physiological  
227 expression of the mutated IL-7R $\alpha$ <sup>449F</sup> subunit (unpublished data), we limited our use of  
228 SLEC markers to KLRG1. Testing the expression of KLRG1 in peptide-specific cells  
229 revealed a reduced proportion of KLRG1<sup>+</sup> cells in both NP<sub>366-374</sub> and PA<sub>224-233</sub>-specific  
230 cells of IL-7R $\alpha$ <sup>449F</sup> mice (Fig. 5). However, the difference in KLRG1 expression between  
231 WT and IL-7R $\alpha$ <sup>449F</sup> mice was greater in PA<sub>224-233</sub>-specific compared to NP<sub>366-374</sub>-specific  
232 cells (Fig. 5). These data suggest that IL-7R $\alpha$  signaling plays a role in the terminal  
233 differentiation of antigen specific CD8 T cells.

234

## 235 **Reduced degranulation and cytokine production by IL-7R $\alpha$ <sup>449F</sup> CD8 T cells**

236            Secretion of cytotoxic granules and inflammatory cytokines is a major event in  
237 the CD8 T cell effector response. Lysosome associated membrane protein-1 (LAMP-1)  
238 or CD107a is a membrane glycoprotein found in the lumen of granzyme B and perforin  
239 containing vesicles. Detection of CD107a on the surface of CD8 T cells through flow  
240 cytometry provides a direct method for identifying degranulating cells (33). Using this  
241 method, we noted that CD8 T cells of IL-7R $\alpha$ <sup>449F</sup> mice had reduced CD107a expression  
242 in antigen experienced cells (CD44<sup>+</sup>) and in PA<sub>224-233</sub>-specific cells indicating decreased  
243 degranulation in these populations (Fig. 6a and b). Interestingly, this defect was notable  
244 in PA<sub>224-233</sub>-specific cells but not in NP<sub>366-374</sub>-specific cells. Furthermore, the proportion  
245 of cells expressing CD127 was notably higher in PA<sub>224-233</sub>-specific cells compared to  
246 NP<sub>366-374</sub>-specific cells in WT mice indicating increased influence of IL-7 on PA<sub>224-233</sub>-  
247 specific cells (Fig. 6c).

248            To determine if IL-7 signaling affects cytokine production, we treated whole lung  
249 single cell suspensions from infected mice with NP<sub>366-374</sub> and PA<sub>224-233</sub> peptides *ex vivo*  
250 and stained intracellular cytokines to detect IFN $\gamma$  and TNF $\alpha$  using flow cytometry. NP<sub>366-</sub>  
251 <sub>374</sub>-specific cells generated low proportion of IFN $\gamma$ <sup>+</sup> TNF $\alpha$ <sup>+</sup> cells compared to PA<sub>224-233</sub>-  
252 specific cells regardless of mouse genotype (Fig. 7a). However, WT PA<sub>224-233</sub>-specific  
253 cells generated abundant IFN $\gamma$ <sup>+</sup> TNF $\alpha$ <sup>+</sup> cells, which were largely absent within IL-  
254 7R $\alpha$ <sup>449F</sup> PA<sub>224-233</sub>-specific cells (Fig. 7b). We used TSLPR<sup>-/-</sup> mice as controls since IL-  
255 7R $\alpha$  is required for both IL-7 and TSLP signaling. We found that TSLPR<sup>-/-</sup> CD8 T cells

256 presented with reduced cytokine production as well, however, this effect did not follow  
257 the same pattern as with IL-7R $\alpha^{449F}$  mice (Fig. 7a and b).

258 To determine if IL-7 independently affects cytokine production, we used IL-  
259 7<sup>eGFP/eGFP</sup> mice that have an eGFP gene inserted disruptively into an *Il7* exon thus  
260 serving as an IL-7 ligand knock-out in homozygotes (30). Using this mouse model, we  
261 established that IL-7 is required for accumulation of IFN $\gamma^+$  TNF $\alpha^+$  cells within PA<sub>224-233</sub>-  
262 specific but not NP<sub>366-374</sub>-specific cells (Fig. 8a and b).

263

#### 264 **IL-7 signaling regulates expression of PD-1 in PA<sub>224-233</sub> but not NP<sub>366-374</sub>-specific** 265 **CD8 T cells**

266 Expression of inhibitory molecules such as PD-1 is known to be important to  
267 negatively regulate T cell activation and limit inflammation by T cells, however,  
268 sustained expression of these molecules can lead to dampening of protective immune  
269 responses (34). To understand how IL-7 affects PA<sub>224-233</sub>-specific but not NP<sub>366-374</sub>-  
270 specific T cells, we evaluated the expression of the inhibitory receptor PD-1. We  
271 showed that IL-7R $\alpha^{449F}$  and IL-7<sup>eGFP/eGFP</sup> CD8 T cells have higher expression of this  
272 molecule (Fig. 9a and b). Specifically, the increase in PD-1 expression in IL-7R $\alpha^{449F}$  and  
273 IL-7<sup>eGFP/eGFP</sup> CD8 T cells was only evident in PA<sub>224-233</sub>-specific cells but not NP<sub>366-374</sub>-  
274 specific cells (Fig. 9a and b). In addition, TSLPR<sup>-/-</sup> CD8 T cells did not present with  
275 increased PD-1 expression (Fig. 9a). Together, this suggests that IL-7 plays distinct  
276 roles in CD8 T cell function depending on antigen specificity possibly by regulating PD-1  
277 expression.

## 278 Discussion

279 Initial studies of IL-7 have described its role in B-cell lymphopoiesis and  
280 thymopoiesis (35-37). The bone marrow and thymus are the best defined sources of IL-  
281 7 production consistent with such roles in primary lymphopoiesis (10). Subsequent  
282 studies showed a role for IL-7 in memory cell development and maintenance, in effector  
283 response to viral infections and in enhancing T cell functions in chronic conditions (14-  
284 16). CD8 T cell expansion and effector function depends on multiple factors including,  
285 but not limited to, the cytokine milieu. Previously, we demonstrated that IL-7 is required  
286 for the accumulation of tetramer positive CD4 and CD8 T cells during influenza infection  
287 (17). The mechanism by which IL-7 accomplishes this and its role in other aspects of T  
288 cell response have yet to be elucidated.

289 We addressed these questions by using mice that express a hypomorphic IL-7R $\alpha$   
290 (IL-7R $\alpha^{449F}$ ) which leads to impaired IL-7 signaling by primarily abrogating STAT5  
291 activation (14). This model provides a better alternative to using IL-7R $\alpha^{-/-}$  mice since IL-  
292 7R $\alpha^{449F}$  mice have defective signaling yet retain sufficient number of T cells to perform  
293 infection studies. We have previously used this mouse model to demonstrate an intact  
294 CD8 T cell effector response to intracellular *Listeria monocytogenes* infection (14). In  
295 the current study, we found that defective IL-7R $\alpha$  signaling led to reduced accumulation  
296 of influenza-specific CD8 T cells in the secondary lymphoid organ (mdLN) at early  
297 priming stages (5 dpi) which ultimately led to reduced accumulation of influenza-specific  
298 CD8 T cells in the lungs. Examination of IL-7R $\alpha^{449F}$  mdLN revealed a great reduction in  
299 its size. This is consistent with the fact that IL-7 is required for the development of  
300 lymphoid tissue inducer (LTi) cells that seed LN anlagen and drive the organogenesis

301 of LNs (19). Considering IL-7R $\alpha^{449F}$  mice had reduced, albeit notable, numbers of  
302 influenza-specific CD8 T cells in their lungs, it is unclear where and how these CD8 T  
303 cells expand to significant numbers with an abnormal mdLN. It is possible that tertiary  
304 lymphoid organs in the lung tissues such as inducible bronchus-associated lymphoid  
305 tissue (iBALT) provide a suitable environment for the accumulation of *de novo* pathogen  
306 specific cells without requiring IL-7 or LT $\alpha$  cells (38). We have shown that despite such  
307 extrinsic factors, IL-7R $\alpha$  signaling is required cell intrinsically by CD8 T cells for early  
308 priming in the mdLN.

309 It is known that a population of CD8 T cells specific to a distinct peptide do not  
310 originate from a single naïve precursor but rather from 10s to 100s of precursors (39-  
311 41). IL-7 signaling deficient mice have reduced thymic output of T cells, and this may  
312 result in a more stochastic or reduced chance of a T cell encountering a cognate MHC-  
313 peptide leading to reduced clonal expansion. In addition to these effects, IL-7 can play a  
314 role cell intrinsically by affecting TCR repertoire via VDJ recombination or TCR  
315 sensitivity (8, 42). We addressed this by adoptive transfer of CD8 T cells bearing a  
316 transgenic TCR (OT-I) in equal numbers (WT vs IL-7R $\alpha^{449F}$ ) intravenously into congenic  
317 WT mice. Using this approach, we found that OT-I;IL-7R $\alpha^{449F}$  CD8 T cells expanded in  
318 response to infection with influenza PR8-OVA to a lower extent compared to OT-I CD8  
319 T cells within total host CD8 T cells. Our findings show that IL-7 is intrinsically important  
320 for the accumulation of pathogen-specific CD8 T cells during early priming phase in the  
321 mdLN independent of TCR specificity and the number of naïve T cell precursors. We  
322 have previously shown that IL-7R $\alpha^{449F}$  CD8 T cell form antigen-specific cells normally  
323 during systemic *in vivo* infection with *L. monocytogenes* yet do not proliferate well when

324 exposed to suboptimal TCR stimulation *in vitro* in contrast to high dose TCR stimulation  
325 (14). It is possible a low dose, local influenza infection recapitulates the low level TCR  
326 stimulation model whereby IL-7 plays an essential role in CD8 T cells under low TCR  
327 avidity activation.

328 In addition to the intrinsic role that IL-7 plays in CD8 T cells, we found that IL-  
329  $7R\alpha^{449F}$  mice have continued accumulation of CD11b<sup>+</sup> DCs in the lungs while in WT  
330 mice, the number of CD11b<sup>+</sup> DCs peaks at 7 dpi then subsides. Previous studies using  
331 IL-7<sup>-/-</sup> and IL-7R $\alpha$ <sup>-/-</sup> showed normal development of DC precursors in the BM, however  
332 these mice had reduced migratory DCs in secondary lymphoid organs (22). Our BM  
333 chimera experiments showed that the effect of IL-7 in DC accumulation was indirect.  
334 Therefore, the accumulation of DCs we noted in IL-7R $\alpha^{449F}$  mice was not due to a  
335 problem with migration or maturation and was likely due to the fact that viral clearance  
336 was impaired which led to continued recruitment of DCs to the lungs.

337 We have demonstrated for the first time that IL-7 is inducible in lung epithelial  
338 cells in response to viral infection *in vivo*. While the increase in total IL-7-eGFP<sup>+</sup> cells in  
339 the lung was modest, we noted a shift in the population that are positive for IL-7-eGFP.  
340 In naïve mice, the majority of IL-7-eGFP<sup>+</sup> cells were lymphatic endothelial cells (LECs)  
341 as previously reported (30, 31). However, following infection with influenza, IL-7-eGFP<sup>+</sup>  
342 epithelial cells (ECs) and to a lesser extent stromal cells (SCs) expanded while LECs  
343 decreased in frequency. Our results demonstrate that IL-7 can be produced by lung  
344 tissues and this could shape the function of CD127 expressing CD8 T cells locally. It is  
345 unclear to what extent IL-7 produced by epithelial cells influences nearby cells and the



346 significance of the shift in sources of IL-7. In addition, more sensitive approaches are  
347 required to compare the levels of IL-7 expression between the different lung tissues.

348 Terminal differentiation of activated CD8 T cells is important for the generation of  
349 short-lived effector cells (SLECs) that express killer cell lectin-like receptor G1 (KLRG1)  
350 and low CD127 (6, 32). We found that following infection with influenza, IL-7R $\alpha^{449F}$   
351 pathogen-specific CD8 T cells have reduced expression of KLRG1 and terminal  
352 differentiation to SLEC. The difference in KLRG1 expression between WT and IL-  
353 7R $\alpha^{449F}$  mice was greater within PA<sub>224-233</sub>-specific cells than in NP<sub>366-374</sub>-specific cells.  
354 We also noted a similar trend in CD107a expression between WT and IL-7R $\alpha^{449F}$  mice  
355 whereby the defect in CD107a expression was more pronounced in PA<sub>224-233</sub>-specific  
356 cells than in NP<sub>366-374</sub>-specific cells. Increased expression of CD127 by PA<sub>224-233</sub>-specific  
357 cells supports the hypothesis that PA<sub>224-233</sub>-specific cells have elevated dependence on  
358 IL-7 signaling.

359 Pro-inflammatory cytokines such as IFN $\gamma$  and TNF $\alpha$  are important during an anti-  
360 viral response to help with recruiting and activating other cells. Within NP<sub>366-374</sub>-specific  
361 cells, we did not observe any differences in expression of IFN $\gamma$  and TNF $\alpha$  between WT  
362 and IL-7R $\alpha^{449F}$  or IL-7<sup>eGFP/eGFP</sup> CD8 T cells. However, the large reduction in IFN $\gamma^+$   
363 TNF $\alpha^+$  population in PA<sub>224-233</sub>-specific cells of IL-7R $\alpha^{449F}$  or IL-7<sup>eGFP/eGFP</sup> mice followed a  
364 similar pattern to our findings with CD107a. NP<sub>366-374</sub>-specific cells did not generate  
365 IFN $\gamma^+$  TNF $\alpha^+$  cells as notably as PA<sub>224-233</sub>-specific cells, consistent with other groups  
366 (43, 44). Our work further corroborates what previous studies have shown, that TSLP  
367 shapes effector T cell responses following influenza infection. However, these effects  
368 were shown to occur indirectly through programming of DCs (45). Altogether, this

369 suggests that IL-7 may differentially regulate effector function of pathogen-specific CD8  
370 T cells between T cell clones. We have not determined the molecular mechanism and  
371 downstream signaling to understand how this occurs.

372 Previous studies have shown hierarchical differences between NP<sub>366-374</sub> and  
373 PA<sub>224-233</sub>-specific CD8 T cells whereby tissue resident memory CD8 T cells that are  
374 NP<sub>366-374</sub>-specific expressed higher levels of inhibitory molecules including PD-1 at 30  
375 dpi and beyond due to persistent antigen exposure and TCR stimulation (46). IL-7 is  
376 also known to enhance cytokine production and reverse T cell exhaustion by repressing  
377 inhibitory pathways during chronic viral infections in mice (15, 16). It is well established  
378 that TCR signaling duration correlates positively with PD-1 expression but little is known  
379 about this phenomenon in the context of influenza-specific CD8 T cells (47, 48). In an  
380 acute hepatitis B virus infection, PD-1 expression in CD8 T cells is negatively correlated  
381 to CD127 expression, and blocking PD-1 in acute lymphocytic choriomeningitis virus  
382 infection increases the frequency of the CD127<sup>+</sup> population (49, 50). Our finding that  
383 PD-1 expression is higher within PA<sub>224-233</sub>-specific but not NP<sub>366-374</sub>-specific CD8 T cells  
384 with IL-7 signaling deficiency is indicative of an antigen-dependent role for IL-7 in  
385 regulating their function. This is suggestive of a negative regulatory role for IL-7 on PD-1  
386 expression dependent on TCR clonotype. This hypothesis is corroborated by a previous  
387 study where infection with a high pathogenicity influenza/A virus strain, such as PR8,  
388 resulted in elevated PD-1 expression in antigen-specific CD8 T cells compared to  
389 infection with the low pathogenicity influenza/A x31 strain (44). This in turn inhibited  
390 effector function by specifically affecting development of IFN $\gamma$ <sup>+</sup> TNF $\alpha$ <sup>+</sup> cells (44). Our  
391 studies suggest that PA<sub>224-233</sub>-specific IL-7 signaling deficient CD8 T cells do not receive

392 the necessary signals to down regulate PD-1. Further studies are required to define the  
393 relationship between IL-7 and PD-1 in an acute infection setting and the mechanism by  
394 which this specifically affects T cells in a clone-specific manner.

395 In summary, we have found that IL-7 is required for an optimal response to acute  
396 influenza infection as it shapes the early priming stages of CD8 T cells. Moreover, IL-7  
397 produced by lung tissues is important for the terminal differentiation and effector  
398 function of CD8 T cells in specific TCR clones of CD8 T cells. Various cytokines have  
399 the ability to enhance CD8 T cell responses, however, rigorous testing is necessary to  
400 evaluate the adverse responses that these cytokines have on bystander cells. Using  
401 cytokines such as IL-7 to complement existing therapies may be beneficial given fewer  
402 off target effects due to the limited subset of cells that express CD127. IL-7 is currently  
403 in clinical trials for treatment of infections and tumors. Additional studies are necessary  
404 to expand the use of IL-7 in other conditions and to study its efficacy when delivered in  
405 combination with other agents.

406

407

408

409

410

411

412

## 413 **Methods**

### 414 Mice

415 All mice were housed and used in the Center for Disease Modelling facility (CDM) at the  
416 University of British Columbia (UBC) and all work with animals was carried out with  
417 approval and in accordance with the ethical guidelines of the University of British  
418 Columbia Animal Care and Biosafety Committees. IL-7R $\alpha$ <sup>449F</sup> mice were generated in-  
419 house as described (14). Briefly, they express a mutant form of the IL-7R $\alpha$  with a single  
420 amino acid mutation from Tyr to Phe at position 449. C57BL/6, BoyJ (B6.SJL-Ptprca  
421 Pepcb/BoyJ) and C57BL/6-Tg (TcraTcrb) 1100Mjb/J (OT-I) mice were obtained from the  
422 Jackson Laboratory (Bar Harbour, ME, USA). IL-7<sup>eGFP/eGFP</sup> mice were a gift from J.M.  
423 McCune (UCSF) (30). In all cases, age-matched and sex-matched male and female  
424 mice between the ages of 6-12 weeks were used.

425

### 426 Virus

427 Influenza A/PR/8/34 (PR8) was purchased from Charles River Laboratories  
428 (Wilmington, MA). Influenza A/PR/8/34-OVA (PR8-OVA) was propagated in-house in  
429 chicken eggs as previously described (51). Mice were sub-lethally infected under  
430 anesthesia (isoflurane) with 5 Hemagglutinin Units (HAU) of influenza PR8 or 64 HAU of  
431 influenza PR8-OVA in 12.5  $\mu$ L of sterile PBS intranasally.

432

### 433 Tissue preparation

434 Mice were anesthetized with 5% isoflurane in 1L/min O<sub>2</sub> and euthanized by cervical  
435 dislocation and perfused with 10 ml cold PBS (+5%FBS, 2mM EDTA). Lungs were  
436 excised and processed by mincing with scissors followed by enzymatic digestion using  
437 180 units/ml collagenase IV and 20 µg/ml DNase I (Worthington biochemical LS004188  
438 and LS002139) in 5 ml RPMI incubated at 37°C for 30-45 mins in a shaker incubator  
439 before filtering through 70 µm filters and lysing RBCs with ACK lysis buffer. To assess  
440 non-hematopoietic cells in the lungs, dispase (1u/ml) was added to the enzyme cocktail.  
441 Mediastinal lymph nodes (mdLN) were collected and crushed through 70 µm filters and  
442 suspended as single cells in cold PBS (5%FBS, 2mM EDTA).

443

#### 444 Antibodies and Flow cytometry

445 All cell surface staining was done at 4°C for 30 mins in the dark. Anti-CD8a [53-6.7]  
446 (APC-eFluor780), anti-B220 [RA3-6B2] (PE-eFluor610), anti-CD44 [IM7] (PE-Cy7), anti-  
447 IFNγ [XMG1.2] (A488), anti-TNFα [MP6-XT22] (PE), anti-MHCII [M5/114.15.2] (FITC),  
448 anti-CD11b [M1/70] (PE-Cy7), anti-CD326/EpCAM [G8.8] (PE-Cy7) anti-CD107a  
449 [eBio1D4B] (PE) and Rat IgG2a kappa Isotype control [eBR2a] (PE) were purchased  
450 from Thermo Fisher (Waltham, Massachusetts). Anti-KLRG1 [MAFA] (APC), anti-  
451 CD127 [SB/199] (PE) anti-PD-1 [29F.1A12] (BV510), anti-CD11b [M1/70] (PE-Cy7),  
452 anti-CD11c [N418] (biotin), anti-CD45 [30-F11] (Pacific Blue), anti-CD45.2 [104]  
453 (PerCP/Cy5.5 or BV421), anti-CD31 [MEC13.3] (biotin), anti-Gp38 [8.1.1] (PE) and anti-  
454 F4/80 [BM8] (PE-Cy7) were purchased from Biolegend (San Diego, California). Anti-  
455 CD103 [M290] (PE), anti-TCR Vα2 [B20.1] (PE) and anti-CD45.1 [A20] (APC) were  
456 purchased from BD Biosciences (Franklin Lakes, New Jersey). Anti-CD11c [N418]

457 (Alexa fluor-647), anti-CD45.1 [A20] (A488), anti-B220 [RA-6B2] (FITC) and anti-F4/80  
458 [BM8] (biotin) were purchased from AbLab (Vancouver, British Columbia).

459 Tetramer staining was done at room temperature for 30 mins in the dark. H2-K<sup>b</sup>  
460 tetramers loaded with immune-dominant NP<sub>366-374</sub> and PA<sub>224-233</sub> peptides from influenza  
461 and labeled with Brilliant Violet-421 or Alexa fluor-647 were manufactured and donated  
462 by the NIH Tetramer Core Facility (Atlanta, GA).

463 Viability staining [cat# L34957 and 65-0865-14] (Thermo Fisher) was used according to  
464 manufacturer's instructions.

465 Samples were collected on either a FACSCanto, LSRII (BD Biosciences) or the Attune  
466 NxT (Thermo Fisher) and data were analyzed with FlowJo software Tree Star (Ashland,  
467 Oregon).

468

469 Bone marrow chimeras

470 Recipient mice were irradiated with 2 doses of 6.5 grey (Gy) or 650 rad at least 4 hours  
471 apart. For the following 10 days, they were supplemented with antibiotics ad libitum  
472 (2mg/ml neomycin sulfate). 24 hours after radiation, femurs and tibias were collected  
473 from donor CD45.1 and CD45.2 mice (WT and IL-7R $\alpha$ <sup>449F</sup> respectively). RBCs were  
474 removed using sterile ACK lysis. For tetramer response experiments, a total of 1x10<sup>6</sup>  
475 donor bone marrow (BM) cells were injected intravenously (I.V.) at a 1:1 ratio to deliver  
476 WT:WT or 1:10 ratio to deliver WT:IL-7R $\alpha$ <sup>449F</sup> into Rag1<sup>-/-</sup> hosts. For dendritic cell  
477 experiments, a total of 5x10<sup>5</sup> donor BM cells were injected I.V. at a 1:1 ratio to deliver  
478 WT:WT or WT: IL-7R $\alpha$ <sup>449F</sup> into C57BL/6J;Boy/J (CD45.1/.2) hosts. 6-8 weeks elapsed

479 for reconstitution before challenge with influenza infection. After euthanasia, spleens  
480 and BMs were assessed for reconstitution efficiency and ratios.

481

482 Adoptive transfer

483 Single cell suspensions were prepared from multiple OT-I and OT-I;IL-7R $\alpha$ <sup>449F</sup> mice  
484 spleens and CD8 T cells were purified using the CD8 T cell negative selection kit  
485 (EasySep™ Mouse CD8+ T Cell Isolation Kit) from Stem Cell Technologies. 1x10<sup>6</sup> cells  
486 were transferred I.V. into BoyJ (CD45.1) hosts and 24 hours later hosts are challenged  
487 with 64HAU PR8-OVA intranasally. MdLN was harvested at experimental endpoint and  
488 cells were stained for surface markers and analyzed by flow cytometry as described  
489 above.

490

491 Cell culture and *IL-7* RT-qPCR

492 A549 (ATCC CCL-185) human type II alveolar epithelial cells were obtained from the  
493 American Type Culture Collection (ATCC) (Manassas, Virginia). Cells were passaged  
494 and expanded in 10% FBS F-12K Medium from ATCC (Cat No. 30-2004). For  
495 experimental use, 5x10<sup>5</sup> A549 cells were seeded into 6-well plates in media and  
496 expanded for 24 hours to achieve confluence. After 1 hour of serum starvation, cells  
497 were infected with 200 HAU PR8 in PBS and incubated for 1 hour on a plate shaker to  
498 initiate infection. Virus containing PBS was aspirated and replaced with F-12K media  
499 containing 0.5% BSA and 0.5  $\mu$ g/mL N-tosyl-L-phenylalanine chloromethyl ketone  
500 (TPCK) treated trypsin. Cells were then incubated for the assigned experimental time

501 points. Cells were lysed and RNA was extracted using PureLink RNA Mini Kit (Thermo  
502 Fisher). After treatment with amplification grade DNase I (Thermo Fisher), cDNA was  
503 generated using the iScript cDNA synthesis kit (Bio-Rad) and cDNA quantification was  
504 performed using the Ssofast EvaGreen Supermix kit (Bio-Rad). Primer sequences are  
505 as follows.  $\beta$ -actin Forward: GAC ATG GAG AAA ATC TG;  $\beta$ -actin Reverse: ATG ATC  
506 TGG GTC ATC TTC TC; Human IL-7 Forward: CCA GGT TAA AGG AAG AAA ACC;  
507 Human IL-7 Reverse: TTT CAG TGT TCT TTA GTG CC; Human IFN- $\beta$  Forward: ACG  
508 CCG CAT TGA CCA TCT AT; Human IFN- $\beta$  Reverse: GTC TCA TTC CAG CCA GTG  
509 CTA; M1 Forward: AGA TGA GTC TTC TAA CCG AGG TCG; M1 Reverse: TGC AAA  
510 AAC ATC TTC AAG TCT CTG. Measurements were acquired using the CFX96 Touch  
511 Real-Time PCR Detection System (Bio-Rad).

512

### 513 *Ex vivo* T cell re-stimulation

514 Lungs from mice infected (7-9 days) with PR8 were excised and prepared as above. To  
515 measure CD107a,  $5 \times 10^6$  lung cells were re-stimulated for 4 hours (37° C, 5% CO<sub>2</sub>) with  
516 1% BSA RPMI containing 50 ng/ml PMA and 500 ng/ml Ionomycin from Sigma-Aldrich  
517 (St. Louis, Missouri); Monensin from BD Biosciences (Franklin Lakes, New Jersey) used  
518 according to manufacturer's instructions; and anti-CD107a [eBio1D4B] PE (33).

519 Following re-stimulation, cells were stained for viability and surface markers then  
520 analyzed by flow cytometry.

521 To measure IFN- $\gamma$  and TNF- $\alpha$ ,  $5 \times 10^6$  lung cells were re-stimulated for 3 hours (37° C,  
522 5% CO<sub>2</sub>) with 10 nM NP<sub>366-374</sub> and PA<sub>224-233</sub> peptides from Anaspec (Fremont,



523 California) in the presence of Brefeldin/A from BD Biosciences (Franklin Lakes, New  
524 Jersey) in 1% BSA RPMI. Following re-stimulation, cells were stained for viability and  
525 surface markers followed by intracellular cytokine staining using the Cytotfix/Cytoperm  
526 kit from BD Biosciences (Franklin Lakes, New Jersey) then analyzed by flow cytometry.

527

### 528 **Author contributions**

529 AS conceived and designed the project, performed and analyzed experiments, and  
530 wrote the manuscript. JJ, HBS and CY performed and analyzed experiments and  
531 reviewed the manuscript. JS performed and analyzed experiments. NA conceived and  
532 designed the project and reviewed the manuscript.

533

### 534 **Acknowledgements**

535 We would like to thank Adam Plumb, Julia Lu and Etienne Melese for critical revision of  
536 this manuscript. We would also like to thank the staff at the Centre for Disease Modeling  
537 for animal husbandry and the UBC Flow Cytometry Facility.

538

539

540

541

542

## 543 References

- 544 1. Horimoto T, Kawaoka Y. Influenza: lessons from past pandemics, warnings from current  
545 incidents. *Nat Rev Micro*. 2005;3(8):591-600.
- 546 2. Schotsaert M, Saelens X, Leroux-Roels G. Influenza vaccines: T-cell responses deserve more  
547 attention. *Expert Review of Vaccines*. 2012;11(8):949-62.
- 548 3. Trapani JA, Smyth MJ. Functional significance of the perforin/granzyme cell death pathway. *Nat*  
549 *Rev Immunol*. 2002;2(10):735-47.
- 550 4. Buchholz VR, Schumacher TN, Busch DH. T Cell Fate at the Single-Cell Level. *Annu Rev Immunol*.  
551 2016;34(1):65-92.
- 552 5. Valbon SF, Condotta SA, Richer MJ. Regulation of effector and memory CD8(+) T cell function by  
553 inflammatory cytokines. *Cytokine*. 2016;82:16-23.
- 554 6. Joshi NS, Cui W, Chandele A, Lee HK, Urso DR, Hagman J, et al. Inflammation directs memory  
555 precursor and short-lived effector CD8(+) T cell fates via the graded expression of T-bet transcription  
556 factor. *Immunity*. 2007;27(2):281-95.
- 557 7. Patton DT, Plumb AW, Abraham N. The Survival and Differentiation of Pro-B and Pre-B Cells in  
558 the Bone Marrow Is Dependent on IL-7R $\alpha$  Tyr449. *The Journal of Immunology*. 2014;193(7):3446-55.
- 559 8. Boudil A, Matei IR, Shih HY, Bogdanoski G, Yuan JS, Chang SG, et al. IL-7 coordinates  
560 proliferation, differentiation and Tcra recombination during thymocyte beta-selection. *Nat Immunol*.  
561 2015;16(4):397-405.
- 562 9. Hara T, Shitara S, Imai K, Miyachi H, Kitano S, Yao H, et al. Identification of IL-7-producing cells in  
563 primary and secondary lymphoid organs using IL-7-GFP knock-in mice. *J Immunol*. 2012;189(4):1577-84.
- 564 10. Mazzucchelli RI, Warming S, Lawrence SM, Ishii M, Abshari M, Washington AV, et al.  
565 Visualization and Identification of IL-7 Producing Cells in Reporter Mice. *PLoS ONE*. 2009;4(11):e7637.
- 566 11. Magri M, Yatim A, Benne C, Balbo M, Henry A, Serraf A, et al. Notch ligands potentiate IL-7-  
567 driven proliferation and survival of human thymocyte precursors. *Eur J Immunol*. 2009;39(5):1231-40.
- 568 12. Munitic I, Williams JA, Yang Y, Dong B, Lucas PJ, El Kassar N, et al. Dynamic regulation of IL-7  
569 receptor expression is required for normal thymopoiesis. *Blood*. 2004;104(13):4165-72.
- 570 13. Plumb AW, Sheikh A, Carlow DA, Patton DT, Ziltener HJ, Abraham N. Interleukin-7 in the  
571 transition of bone marrow progenitors to the thymus. *Immunol Cell Biol*. 2017;95(10):916-24.
- 572 14. Osborne LC, Dhanji S, Snow JW, Priatel JJ, Ma MC, Miners MJ, et al. Impaired CD8 T cell memory  
573 and CD4 T cell primary responses in IL-7R alpha mutant mice. *J Exp Med*. 2007;204(3):619-31.
- 574 15. Pellegrini M, Calzascia T, Elford AR, Shahinian A, Lin AE, Dissanayake D, et al. Adjuvant IL-7  
575 antagonizes multiple cellular and molecular inhibitory networks to enhance immunotherapies. *Nat Med*.  
576 2009;15(5):528-36.
- 577 16. Pellegrini M, Calzascia T, Toe JG, Preston SP, Lin AE, Elford AR, et al. IL-7 engages multiple  
578 mechanisms to overcome chronic viral infection and limit organ pathology. *Cell*. 2011;144(4):601-13.
- 579 17. Plumb AW, Patton DT, Seo JH, Loveday E-K, Jean F, Ziegler SF, et al. Interleukin-7, but Not  
580 Thymic Stromal Lymphopoietin, Plays a Key Role in the T Cell Response to Influenza A Virus. *PLoS ONE*.  
581 2012;7(11):e50199.
- 582 18. Buckley RH. Molecular Defects in Human Severe Combined Immunodeficiency and Approaches  
583 to Immune Reconstitution. *Annual Review of Immunology*. 2004;22(1):625-55.
- 584 19. Chappaz S, Finke D. The IL-7 signaling pathway regulates lymph node development independent  
585 of peripheral lymphocytes. *J Immunol*. 2010;184(7):3562-9.
- 586 20. Schmutz S, Bosco N, Chappaz S, Boyman O, Acha-Orbea H, Ceredig R, et al. Cutting edge: IL-7  
587 regulates the peripheral pool of adult ROR gamma+ lymphoid tissue inducer cells. *J Immunol*.  
588 2009;183(4):2217-21.

- 589 21. Plumb AW, Sheikh A, Carlow DA, Patton DT, Ziltener HJ, Abraham N. Interleukin-7 in the  
590 transition of bone marrow progenitors to the thymus. *Immunology & Cell Biology*. 2017;95(10):916-24.
- 591 22. Vogt TK, Link A, Perrin J, Finke D, Luther SA. Novel function for interleukin-7 in dendritic cell  
592 development. *Blood*. 2009;113(17):3961-8.
- 593 23. Guimond M, Veenstra RG, Grindler DJ, Zhang H, Cui Y, Murphy RD, et al. Interleukin 7 signaling  
594 in dendritic cells regulates the homeostatic proliferation and niche size of CD4+ T cells. *Nat Immunol*.  
595 2009;10(2):149-57.
- 596 24. Martin CE, Spasova DS, Frimpong-Boateng K, Kim HO, Lee M, Kim KS, et al. Interleukin-7  
597 Availability Is Maintained by a Hematopoietic Cytokine Sink Comprising Innate Lymphoid Cells and T  
598 Cells. *Immunity*. 2017;47(1):171-82 e4.
- 599 25. Sawa Y, Arima Y, Ogura H, Kitabayashi C, Jiang J-J, Fukushima T, et al. Hepatic Interleukin-7  
600 Expression Regulates T Cell Responses. *Immunity*. 2009;30(3):447-57.
- 601 26. Adachi T, Kobayashi T, Sugihara E, Yamada T, Ikuta K, Pittaluga S, et al. Hair follicle-derived IL-7  
602 and IL-15 mediate skin-resident memory T cell homeostasis and lymphoma. *Nat Med*. 2015;advance  
603 online publication.
- 604 27. Watanabe M, Ueno Y, Yajima T, Okamoto S, Hayashi T, Yamazaki M, et al. Interleukin 7  
605 transgenic mice develop chronic colitis with decreased interleukin 7 protein accumulation in the colonic  
606 mucosa. *J Exp Med*. 1998;187(3):389-402.
- 607 28. Shalapour S, Deiser K, Sercan O, Tuckermann J, Minnich K, Willimsky G, et al. Commensal  
608 microflora and interferon-gamma promote steady-state interleukin-7 production in vivo. *Eur J Immunol*.  
609 2010;40(9):2391-400.
- 610 29. Jin JO, Yu Q. Systemic administration of TLR3 agonist induces IL-7 expression and IL-7-dependent  
611 CXCR3 ligand production in the lung. *Journal of leukocyte biology*. 2013;93(3):413-25.
- 612 30. Miller CN, Hartigan-O'Connor DJ, Lee MS, Laidlaw G, Cornelissen IP, Matloubian M, et al. IL-7  
613 production in murine lymphatic endothelial cells and induction in the setting of peripheral lymphopenia.  
614 *Int Immunol*. 2013;25(8):471-83.
- 615 31. Dahlgren MW, Jones SW, Cautivo KM, Dubinin A, Ortiz-Carpena JF, Farhat S, et al. Adventitial  
616 Stromal Cells Define Group 2 Innate Lymphoid Cell Tissue Niches. *Immunity*. 2019;50(3):707-22 e6.
- 617 32. Remmerswaal EBM, Hombrink P, Nota B, Pircher H, Ten Berge IJM, van Lier RAW, et al.  
618 Expression of IL-7Ralpha and KLRG1 defines functionally distinct CD8(+) T-cell populations in humans.  
619 *Eur J Immunol*. 2019;49(5):694-708.
- 620 33. Betts MR, Koup RA. Detection of T-Cell Degranulation: CD107a and b. *Methods in Cell Biology*.  
621 75: Academic Press; 2004. p. 497-512.
- 622 34. Sharpe AH, Pauken KE. The diverse functions of the PD1 inhibitory pathway. *Nature reviews*  
623 *Immunology*. 2018;18(3):153-67.
- 624 35. Goodwin RG, Lupton S, Schmierer A, Hjerrild KJ, Jerzy R, Clevenger W, et al. Human interleukin  
625 7: molecular cloning and growth factor activity on human and murine B-lineage cells. *Proc Natl Acad Sci*  
626 *U S A*. 1989;86(1):302-6.
- 627 36. Namen AE, Lupton S, Hjerrild K, Wignall J, Mochizuki DY, Schmierer A, et al. Stimulation of B-cell  
628 progenitors by cloned murine interleukin-7. *Nature*. 1988;333(6173):571-3.
- 629 37. Murray R, Suda T, Wrighton N, Lee F, Zlotnik A. IL-7 is a growth and maintenance factor for  
630 mature and immature thymocyte subsets. *Int Immunol*. 1989;1(5):526-31.
- 631 38. Rangel-Moreno J, Carragher DM, de la Luz Garcia-Hernandez M, Hwang JY, Kusser K, Hartson L,  
632 et al. The development of inducible bronchus-associated lymphoid tissue depends on IL-17. *Nat*  
633 *Immunol*. 2011;12(7):639-46.
- 634 39. Jenkins MK, Moon JJ. The role of naive T cell precursor frequency and recruitment in dictating  
635 immune response magnitude. *J Immunol*. 2012;188(9):4135-40.

- 636 40. Arstila TP, Casrouge A, Baron V, Even J, Kanellopoulos J, Kourilsky P. A direct estimate of the  
637 human alphabeta T cell receptor diversity. *Science*. 1999;286(5441):958-61.
- 638 41. Casrouge A, Beaudoin E, Dalle S, Pannetier C, Kanellopoulos J, Kourilsky P. Size estimate of the  
639 alpha beta TCR repertoire of naive mouse splenocytes. *J Immunol*. 2000;164(11):5782-7.
- 640 42. Deshpande P, Cavanagh MM, Le Saux S, Singh K, Weyand CM, Goronzy JJ. IL-7- and IL-15-  
641 mediated TCR sensitization enables T cell responses to self-antigens. *J Immunol*. 2013;190(4):1416-23.
- 642 43. Belz GT, Xie W, Doherty PC. Diversity of epitope and cytokine profiles for primary and secondary  
643 influenza A virus-specific CD8+ T cell responses. *J Immunol*. 2001;166(7):4627-33.
- 644 44. Rutigliano JA, Sharma S, Morris MY, Oguin TH, 3rd, McClaren JL, Doherty PC, et al. Highly  
645 pathological influenza A virus infection is associated with augmented expression of PD-1 by functionally  
646 compromised virus-specific CD8+ T cells. *J Virol*. 2014;88(3):1636-51.
- 647 45. Yadava K, Sichelstiel A, Luescher IF, Nicod LP, Harris NL, Marsland BJ. TSLP promotes influenza-  
648 specific CD8+ T-cell responses by augmenting local inflammatory dendritic cell function. *Mucosal*  
649 *Immunol*. 2013;6(1):83-92.
- 650 46. Wang Z, Wang S, Goplen NP, Li C, Cheon IS, Dai Q, et al. PD-1(hi) CD8(+) resident memory T cells  
651 balance immunity and fibrotic sequelae. *Sci Immunol*. 2019;4(36):eaaw1217.
- 652 47. Bally AP, Austin JW, Boss JM. Genetic and Epigenetic Regulation of PD-1 Expression. *J Immunol*.  
653 2016;196(6):2431-7.
- 654 48. Youngblood B, Oestreich KJ, Ha SJ, Duraiswamy J, Akondy RS, West EE, et al. Chronic virus  
655 infection enforces demethylation of the locus that encodes PD-1 in antigen-specific CD8(+) T cells.  
656 *Immunity*. 2011;35(3):400-12.
- 657 49. Boettler T, Panther E, Bengsch B, Nazarova N, Spangenberg HC, Blum HE, et al. Expression of the  
658 interleukin-7 receptor alpha chain (CD127) on virus-specific CD8+ T cells identifies functionally and  
659 phenotypically defined memory T cells during acute resolving hepatitis B virus infection. *J Virol*.  
660 2006;80(7):3532-40.
- 661 50. Ahn E, Araki K, Hashimoto M, Li W, Riley JL, Cheung J, et al. Role of PD-1 during effector CD8 T  
662 cell differentiation. *Proc Natl Acad Sci U S A*. 2018;115(18):4749-54.
- 663 51. Jenkins MR, Webby R, Doherty PC, Turner SJ. Addition of a prominent epitope affects influenza  
664 A virus-specific CD8+ T cell immunodominance hierarchies when antigen is limiting. *J Immunol*.  
665 2006;177(5):2917-25.

666

667

668

669

670

671

672

673 **Figure legends**

674

675 Figure 1. Accumulation of tetramer specific response in IL-7R $\alpha^{449F}$  is impaired following  
676 influenza infection. **(a, b)** Representative FACS plots and bar graphs of the frequency of  
677 NP<sub>366-374</sub><sup>+</sup> and PA<sub>224-233</sub><sup>+</sup> cells within CD8 T cells in **(a)** the lungs 7 dpi and **(b)** mdLN 5  
678 dpi of WT and IL-7R $\alpha^{449F}$  mice . Gated within Live B220<sup>-</sup>, CD8<sup>+</sup>, (CD44<sup>+</sup>) cells. **(c)**  
679 Photograph images offering comparison of various mouse lymph nodes and **(d)** total  
680 number of NP<sub>366-374</sub><sup>+</sup> and PA<sub>224-233</sub><sup>+</sup> cells in the mdLN of WT and IL-7R $\alpha^{449F}$  mice at the  
681 indicated days post infection. Data are representative of 2–3 experiments with n=4–7  
682 per genotype. \**P*<0.05 as determined by two-tailed Student's t-test.

683

684 Figure 2. Impairment in tetramer specific response seen in the mdLN of IL-7R $\alpha^{449F}$  mice  
685 is cell intrinsic. **(a)** Schematic of bone marrow chimera set-up. **(b)** Representative FACS  
686 plots and bar graphs of the frequency of NP<sub>366-374</sub><sup>+</sup> and PA<sub>224-233</sub><sup>+</sup> cells within CD8 T  
687 cells in the mdLN of WT and IL-7R $\alpha^{449F}$  chimeric mice 9 dpi. Gated within live, B220<sup>-</sup>,  
688 CD8<sup>+</sup>, CD44<sup>+</sup>, CD45.1<sup>+</sup> or CD45.2<sup>+</sup> cells. Data are representative of two experiments  
689 with n=5-7 per genotype. \**P*<0.05 as determined by two-tailed Student's t-test.

690

691 Figure 3. Expansion of adoptively transferred OTI-IL-7R $\alpha^{449F}$  CD8 T cells is impaired in  
692 the mdLN following influenza infection. **(a)** Scatter plot and representative bar graph of  
693 CD45.2<sup>+</sup> V $\alpha$ 2<sup>+</sup> CD8 T cells in BoyJ (CD45.1<sup>+</sup>) mice 4 dpi. Gated within live B220<sup>-</sup> CD8<sup>+</sup>  
694 cells. **(b)** Histogram and **(c)** bar graph of median florescence intensity (MFI) of activation

695 markers (CD5, TCR (V $\alpha$ 2), and CD69). Data are representative of two experiments.

696 \* $P$ <0.05 and \*\* $P$ <0.01 as determined by two-tailed Student's t-test.

697

698 Figure 4. IL-7 expression in lung tissues. **(a)** Quantitative PCR of IL-7, IFN- $\beta$  and M1 in

699 A549 cells at the indicated times post infection normalized against beta actin. M1

700 expression is further normalized to time point 0h. Data is representative of 2

701 experiments n=3 per experiment. **(b)** Expression of IL-7 in various CD45<sup>-</sup> lung cells

702 using IL-7<sup>eGFP/WT</sup> mice. Epithelial cells (ECs) are CD45<sup>-</sup> EpCAM<sup>+</sup>, stromal cells (SCs)

703 are CD45<sup>-</sup> EpCAM<sup>-</sup> CD31<sup>-</sup> and lymphatic endothelial cells (LECs) are CD45<sup>-</sup> EpCAM<sup>-</sup>

704 and CD31<sup>+</sup> GP38<sup>+</sup>. Data are representative of two experiments with n=4 per genotype.

705 \* $P$ <0.05 as determined by two-tailed Student's t-test.

706

707 Figure 5. CD8 T cells of IL-7R $\alpha$ <sup>449F</sup> mice have reduced terminal differentiation. Scatter

708 plots and bar graphs showing flow cytometric analysis of KLRG1 expression as a

709 percentage within lung NP<sub>366-374</sub><sup>+</sup> and PA<sub>224-233</sub><sup>+</sup> CD8 T cells of WT and IL-7R $\alpha$ <sup>449F</sup> mice

710 7-9 dpi. Data are representative of three experiments with n=4–6 per genotype. \* $P$ <0.05

711 as determined by two-tailed Student's t-test.

712

713 Figure 6. Reduced degranulation of IL-7R $\alpha$ <sup>449F</sup> lung CD8 T cells upon re-stimulation. **(a)**,

714 **(b)** CD107a expression as median fluorescence intensity (MFI) in all antigen experienced

715 (CD44<sup>+</sup>), NP<sub>366-374</sub><sup>+</sup> and PA<sub>224-233</sub><sup>+</sup> CD8 T cells of WT and IL-7R $\alpha$ <sup>449F</sup> mice 7 dpi after

716 PMA/Ionomycin re-stimulation. Data presented as **(a)** FACS plots and **(b)** bar graphs.

717 Gated within Live B220<sup>-</sup>, CD8<sup>+</sup>, CD44<sup>+</sup>, NP<sub>366-374</sub><sup>+</sup> or PA<sub>224-233</sub><sup>+</sup> cells. Data are  
718 representative of two experiments with n=4 per genotype. \**P*<0.05 as determined by  
719 two-tailed Student's t-test. **(c)** Scatter plots and Bar graphs showing flow cytometric  
720 analysis comparison of CD127 expression as a percentage within lung NP<sub>366-374</sub><sup>+</sup> and  
721 PA<sub>224-233</sub><sup>+</sup> CD8 T cells 7 dpi. Gated within Live B220<sup>-</sup>, CD8<sup>+</sup>, CD44<sup>+</sup>, NP<sub>366-374</sub><sup>+</sup> or PA<sub>224-  
722 233</sub><sup>+</sup> cells. Data are representative of three experiments with n=4-5 per genotype.  
723 \**P*<0.05 as determined by two-tailed Student's t-test.

724

725 Figure 7. Deregulated cytokine production in IL-7Rα<sup>449F</sup> and TSLPR<sup>-/-</sup> lung CD8 T cells.  
726 Representative scatter plots and bar charts of IFN-γ<sup>+</sup> TNF-α<sup>-</sup> or IFN-γ<sup>+</sup> TNF-α<sup>+</sup> CD8 T  
727 cells within **(a)** NP<sub>366-374</sub><sup>+</sup> and **(b)** PA<sub>224-233</sub><sup>+</sup> CD8 T cells 9 dpi and after peptide (NP or  
728 PA) re-stimulation. Gated within Live B220<sup>-</sup>, CD8<sup>+</sup>, tetramer<sup>+</sup> cells. Data is  
729 representative of three independent experiments with n=3-5 mice per genotype.  
730 \**P*<0.05 as determined by two-tailed Student's t-test.

731

732 Figure 8. Deregulated cytokine production in IL-7<sup>eGFP/eGFP</sup> lung CD8 T cells.  
733 Representative scatter plots and bar charts of IFN-γ<sup>+</sup> TNF-α<sup>-</sup> or IFN-γ<sup>+</sup> TNF-α<sup>+</sup> CD8 T  
734 cells within **(a)** NP<sub>366-374</sub><sup>+</sup> and **(b)** PA<sub>224-233</sub><sup>+</sup> CD8 T cells 9 dpi and after peptide (NP or  
735 PA) re-stimulation. Gated within Live B220<sup>-</sup>, CD8<sup>+</sup>, tetramer<sup>+</sup> cells. Data is  
736 representative of two independent experiments with n=3-4 mice per genotype. \**P*<0.05  
737 as determined by two-tailed Student's t-test.

738



739 Figure 9. Increased PD-1 expression in IL-7 signaling deficient CD8 T cells.  
740 Representative histogram plots and bar charts of PD-1 expression in antigen specific  
741 lung CD8 T cells of **(a)** WT vs IL-7R $\alpha^{449F}$  vs TSLPR $^{-/-}$  and **(b)** WT vs IL-7 $^{eGFP/eGFP}$ . Gated  
742 within Live B220 $^{-}$ , CD8 $^{+}$ , tetramer $^{+}$  cells. Data is representative of 2-3 independent  
743 experiments with n=3-4 mice per genotype. \* $P < 0.05$  as determined by two-tailed  
744 Student's t-test.

745

746 Supplementary Figure 1. Expansion of adoptively transferred OTI-IL-7R $\alpha^{449F}$  CD8 T  
747 cells is impaired in the mdLN following influenza infection as early as 3 dpi. Scatter plot  
748 and representative bar graph of CD45.2 $^{+}$  V $\alpha$ 2 $^{+}$  CD8 T cells. Gated within Live B220 $^{-}$   
749 CD8 $^{+}$  cells. Datum is representative of a single experiment with n=4. \*\* $P < 0.01$  as  
750 determined by two-tailed Student's t-test.

751

752 Supplementary Figure 2. Loss of IL-7R $\alpha$  signaling leads to increased accumulation of  
753 CD11b $^{+}$  CD103 $^{-}$  dendritic cells in the lungs. **(a)** Flow cytometric analysis showing total  
754 number of CD11b $^{+}$  CD103 $^{-}$  (left) and CD11b $^{-}$  CD103 $^{+}$  (right) dendritic cells in the lungs  
755 of WT and IL-7R $\alpha^{449F}$  mice at indicated days post infection presented as a bar graph.  
756 Gated within Live CD45 $^{+}$ , B220 $^{-}$ , F4/80 $^{-}$ , CD11c $^{hi}$ , MHCII $^{hi}$ , CD11b $^{+/-}$  and CD103 $^{-/+}$ . **(b, c)**  
757 Bone marrow chimera analysis of lung CD11b $^{+}$  CD103 $^{-}$  and CD11b $^{-}$  CD103 $^{+}$  dendritic  
758 cells presented as **(b)** bar graphs and **(c)** FACS plots. **(b)** Data presented as ratio of the  
759 CD45.2:CD45.1 and plotted with log $_{10}$  transformation to normalize skewed data points.



760 Data are representative of two experiments with n=4-6 per genotype. \*\*\* $P < 0.001$  as  
761 determined by two-tailed Student's t-test.

A) Lung 7 dpi

Gated on Live, B220<sup>-</sup>, CD8<sup>+</sup> cells

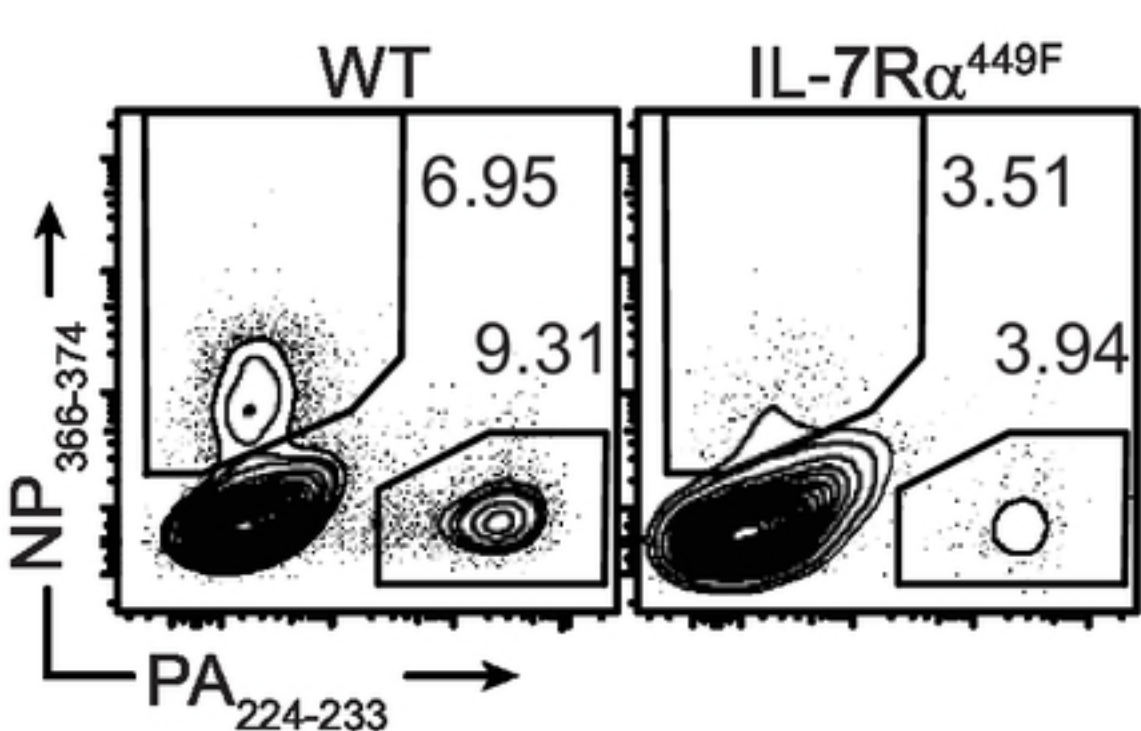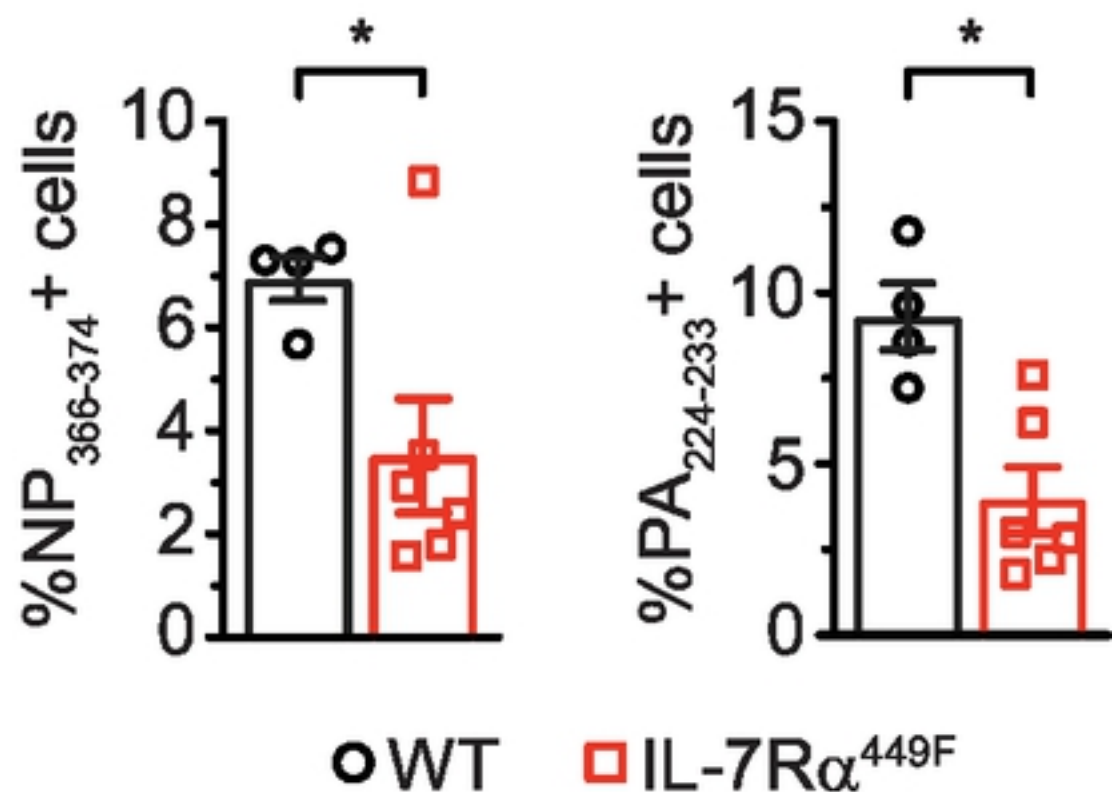

B)

bioRxiv preprint doi: <https://doi.org/10.1101/2021.04.21.440748>; this version posted April 21, 2021. The copyright holder for this preprint (which was not certified by peer review) is the author/funder, who has granted bioRxiv a license to display the preprint in perpetuity. It is made available under aCC-BY 4.0 International license.

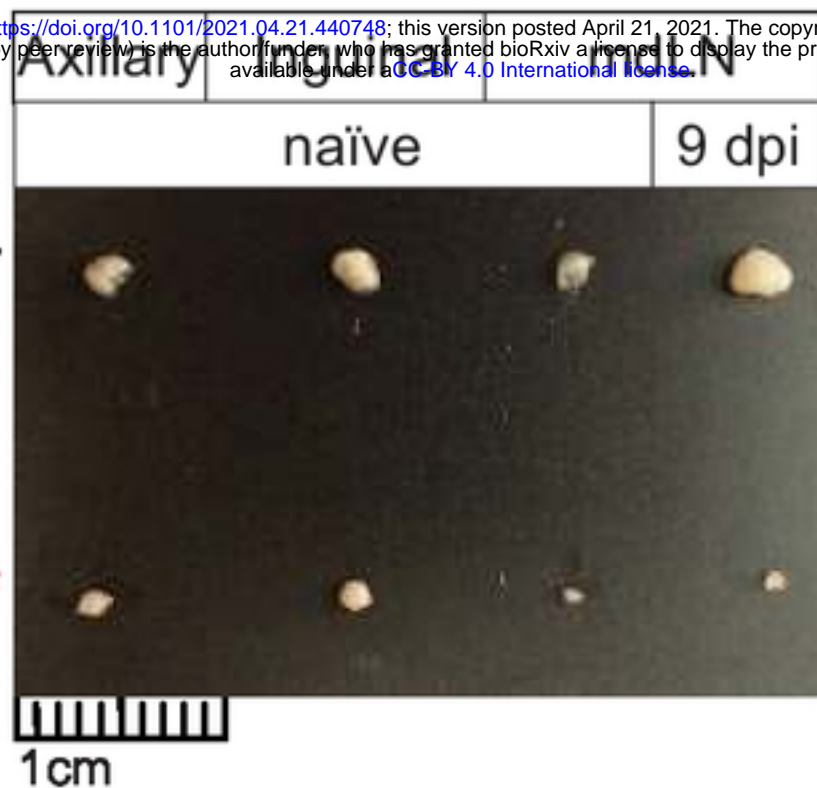

C)

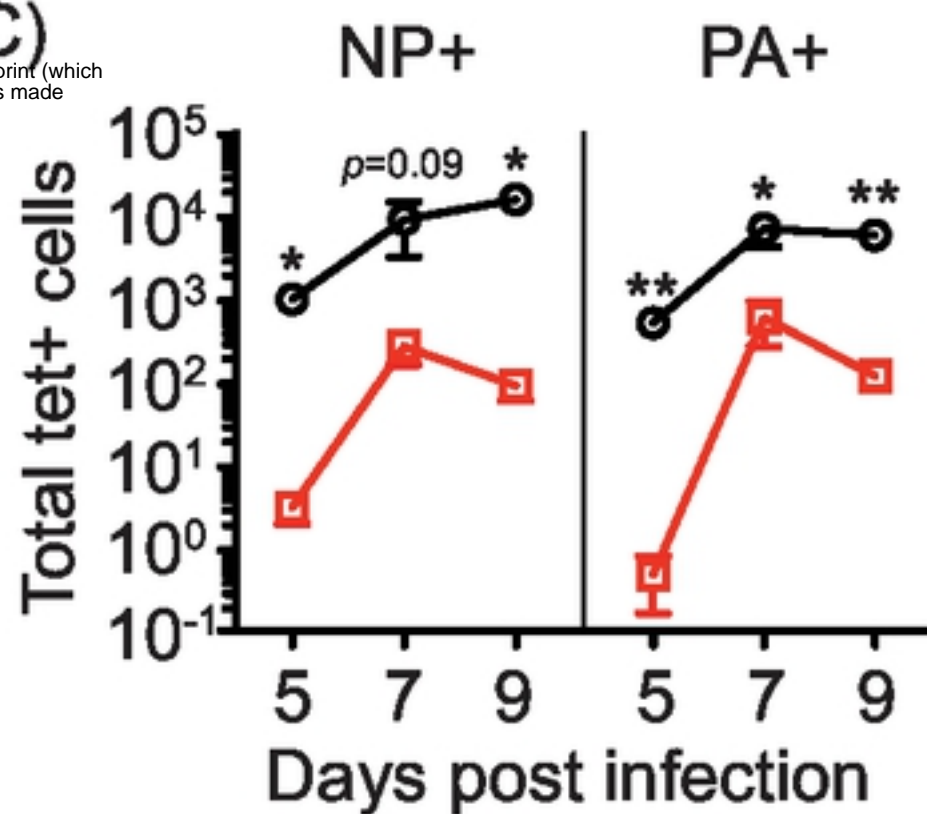

D) mdLN 5 dpi

Gated on Live, B220<sup>-</sup>, CD8<sup>+</sup>, CD44<sup>+</sup> cells

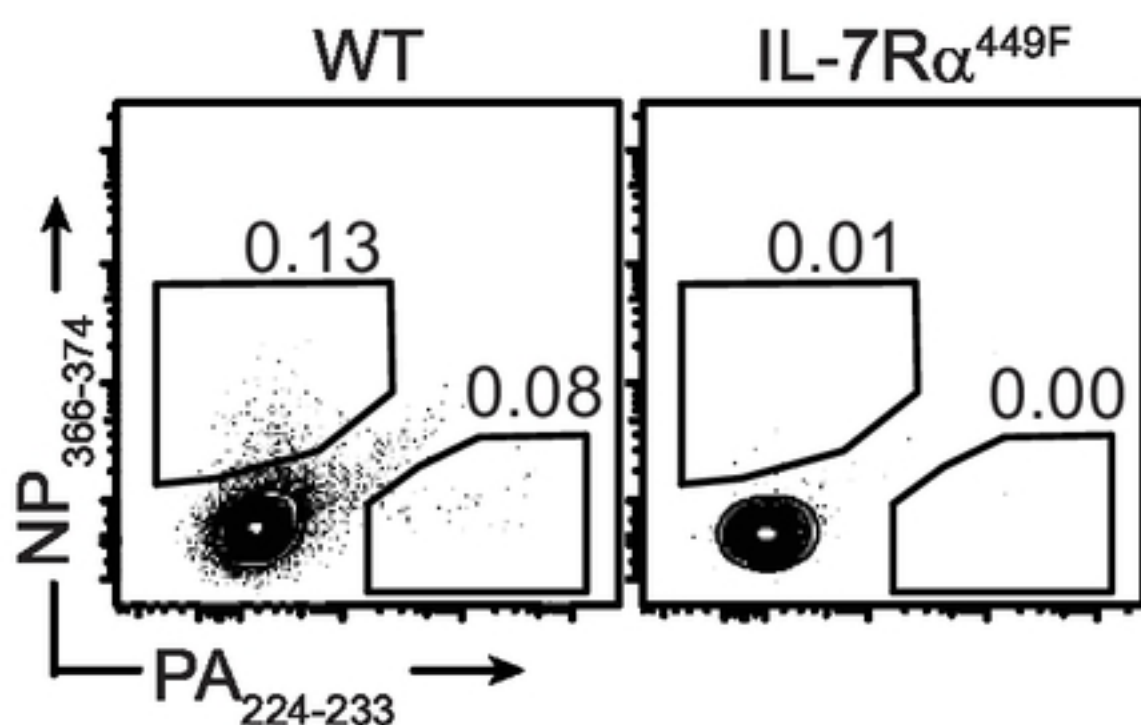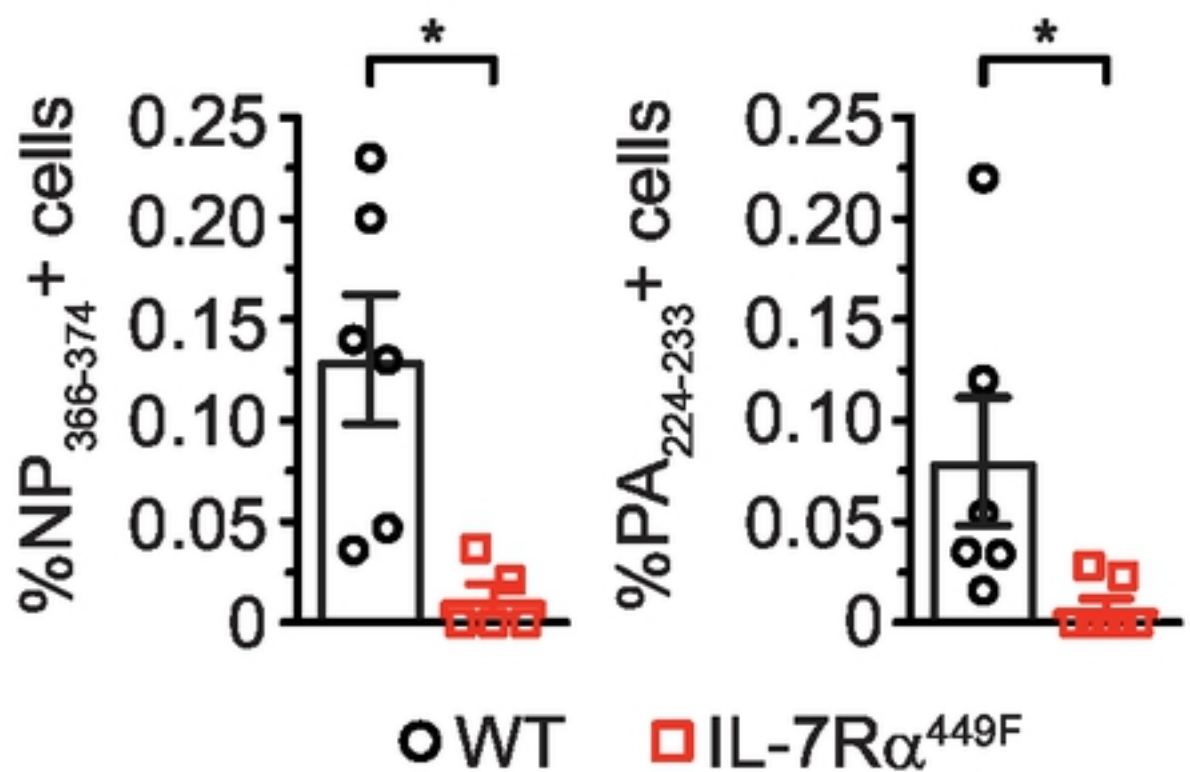

Figure 1

A)

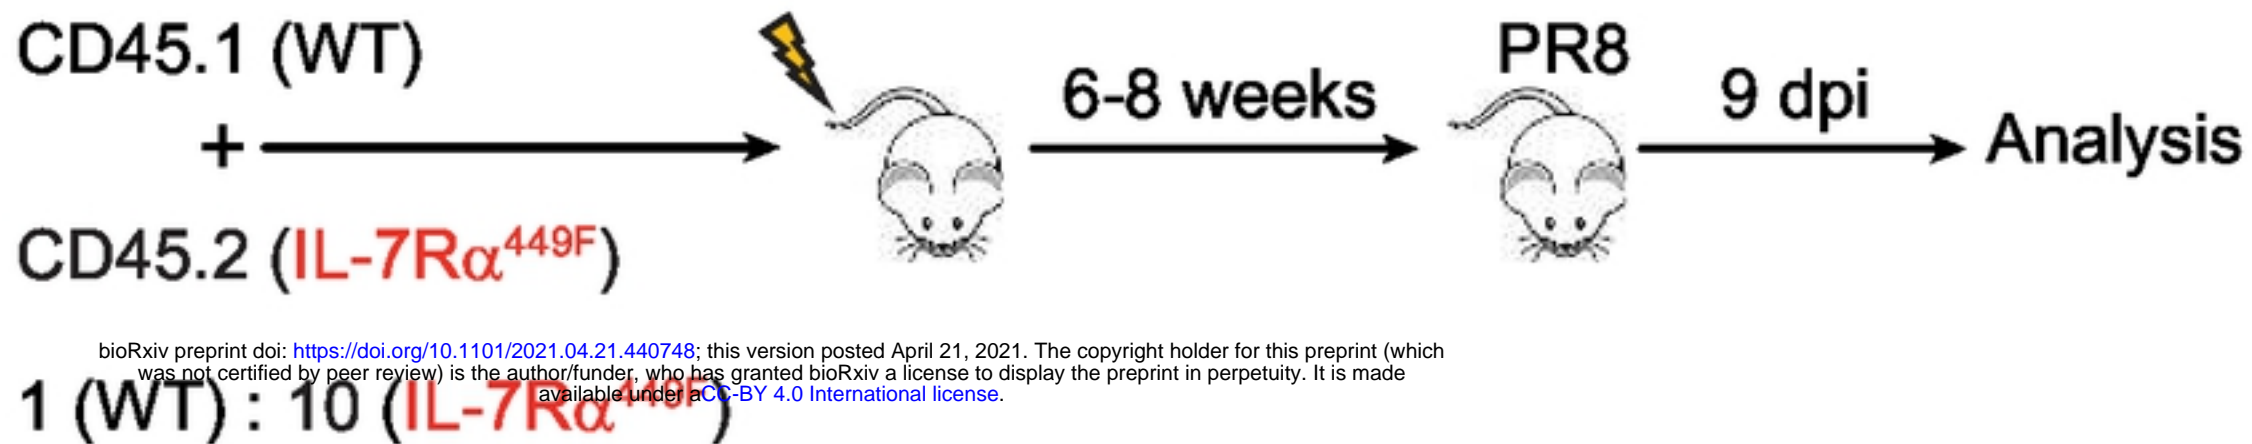

B) mdLN 9 dpi

Gated on Live, B220<sup>-</sup>, CD8<sup>+</sup>, CD44<sup>+</sup> cells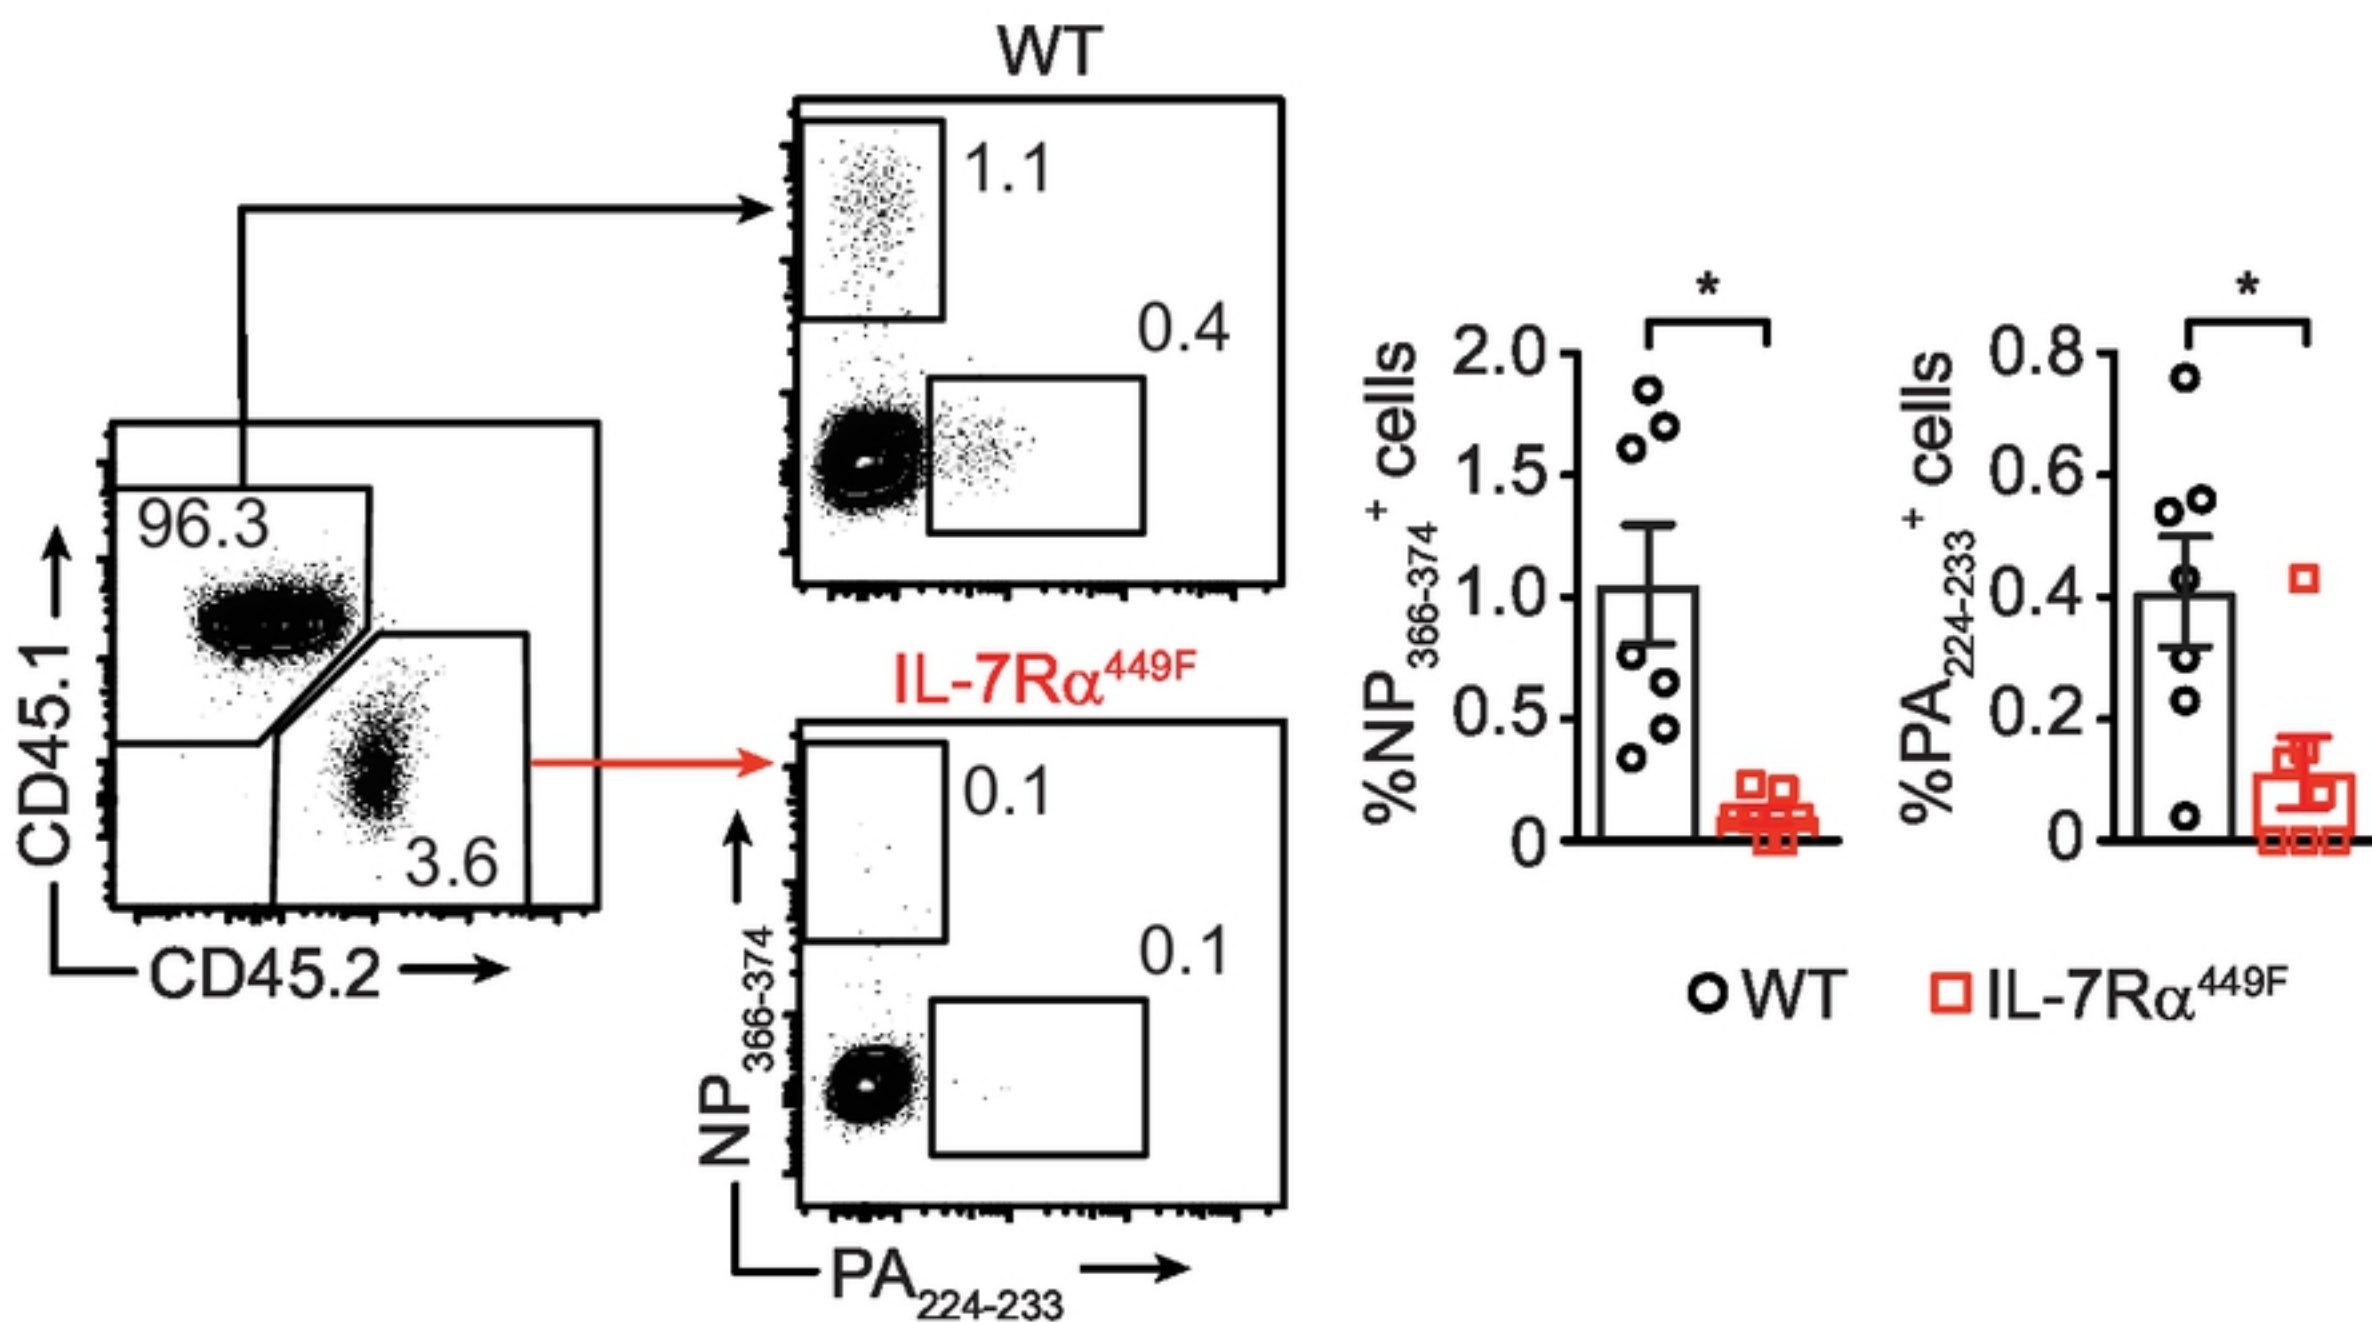

Figure 2



A) Gated on Live, B220<sup>-</sup>, CD8<sup>+</sup> cells

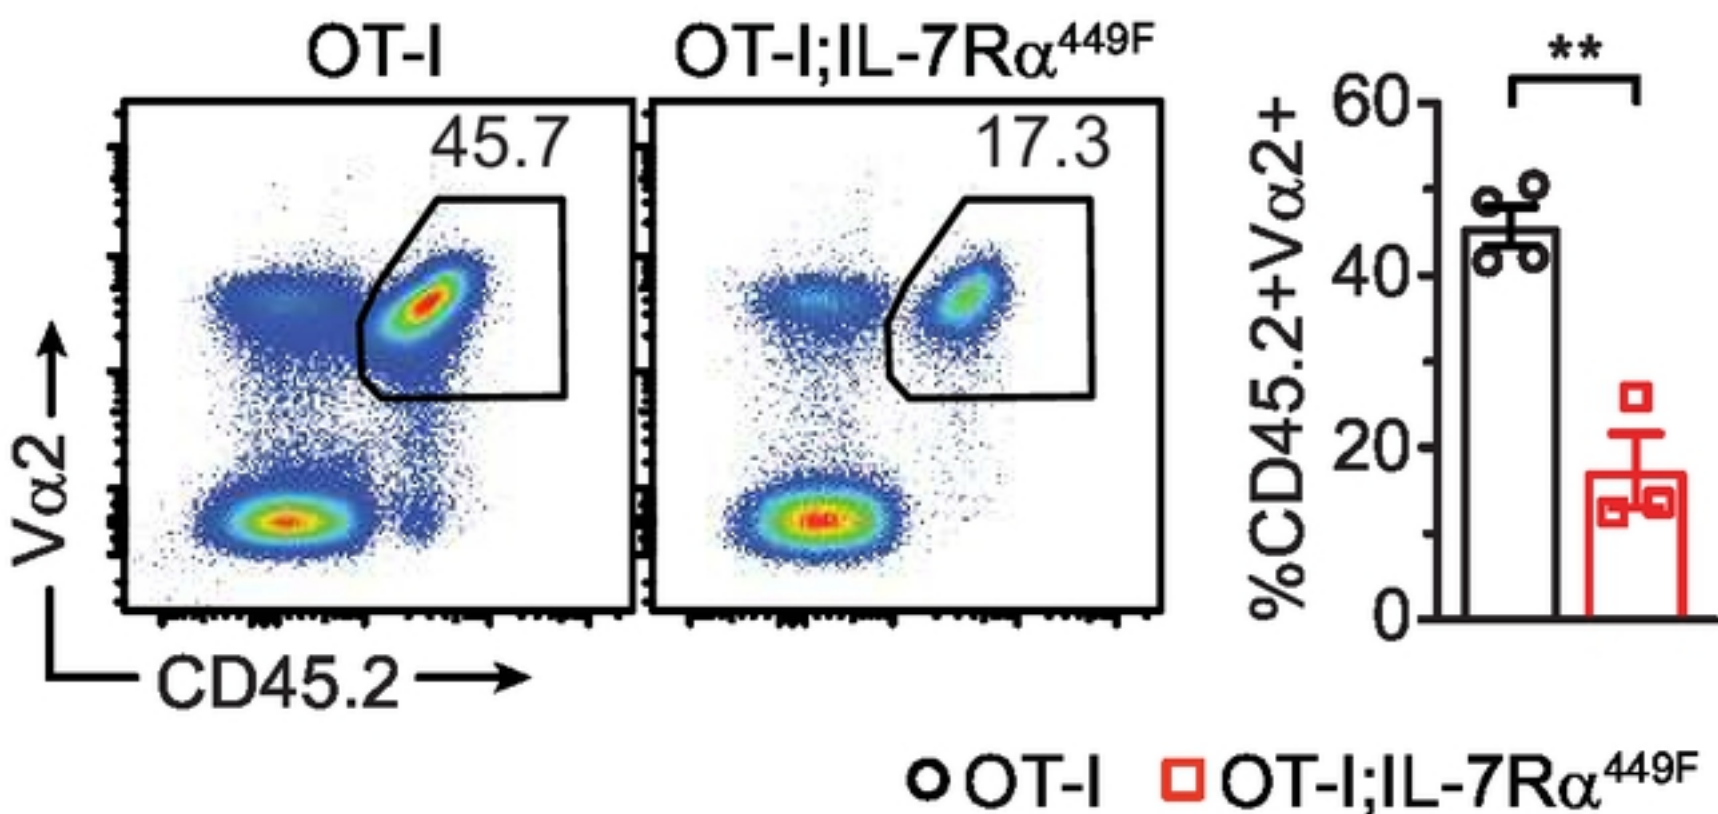

B) Gated on Live, B220<sup>-</sup>, CD8<sup>+</sup> CD45.2<sup>+</sup> V $\alpha$ 2<sup>+</sup> cells

bioRxiv preprint doi: <https://doi.org/10.1101/2021.04.21.440748>; this version posted April 21, 2021. The copyright holder for this preprint (which was not certified by peer review) is the author/funder, who has granted bioRxiv a license to display the preprint in perpetuity. It is made available under aCC-BY 4.0 International license.

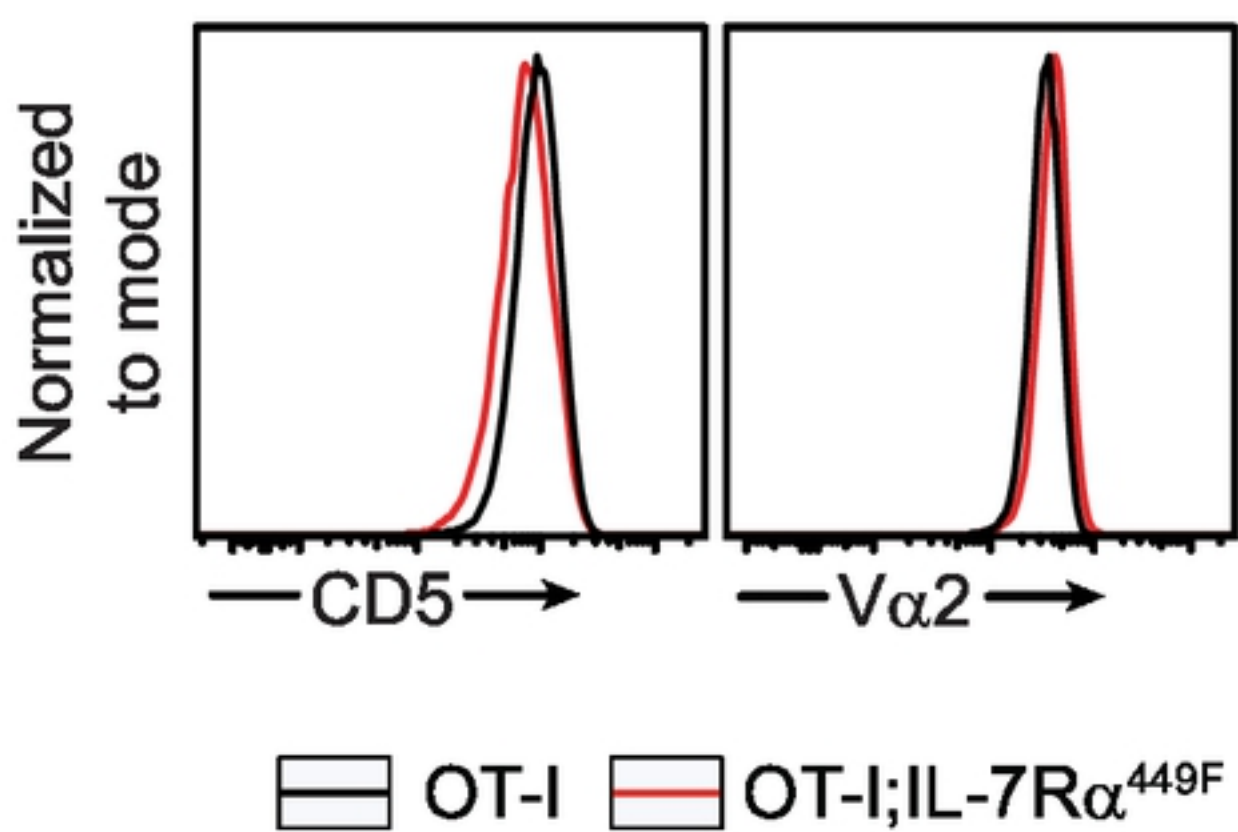

C)

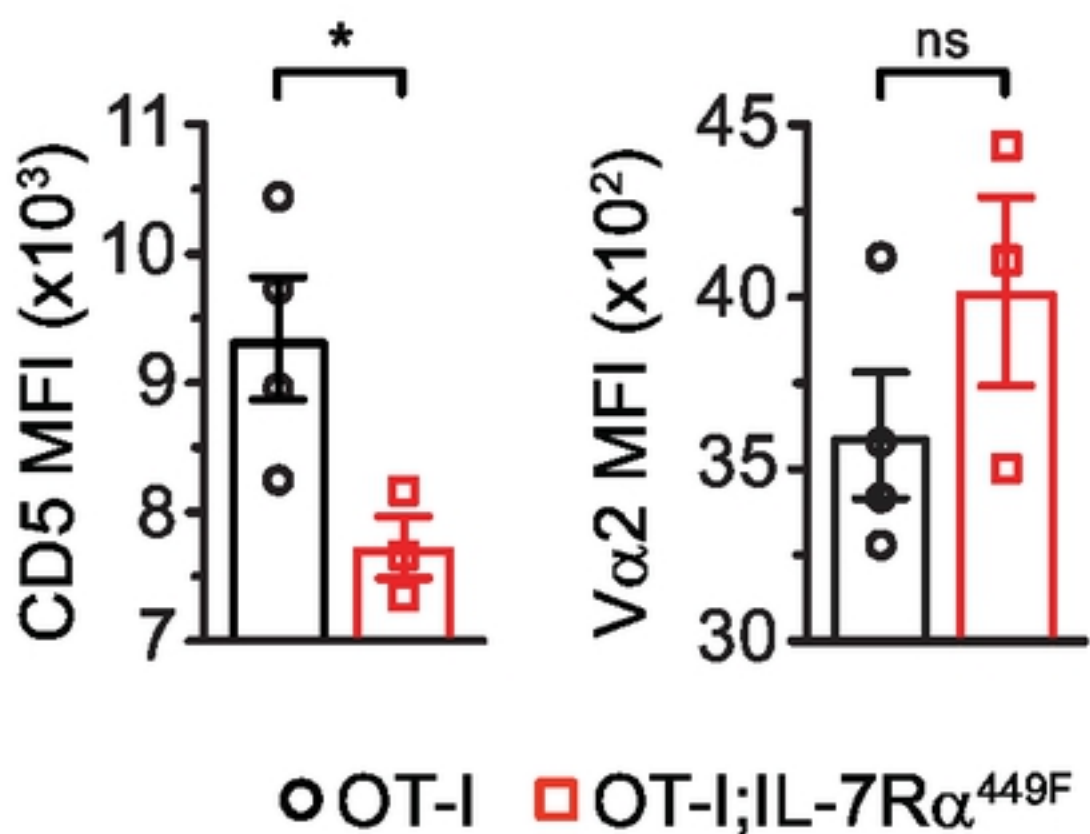

Figure 3

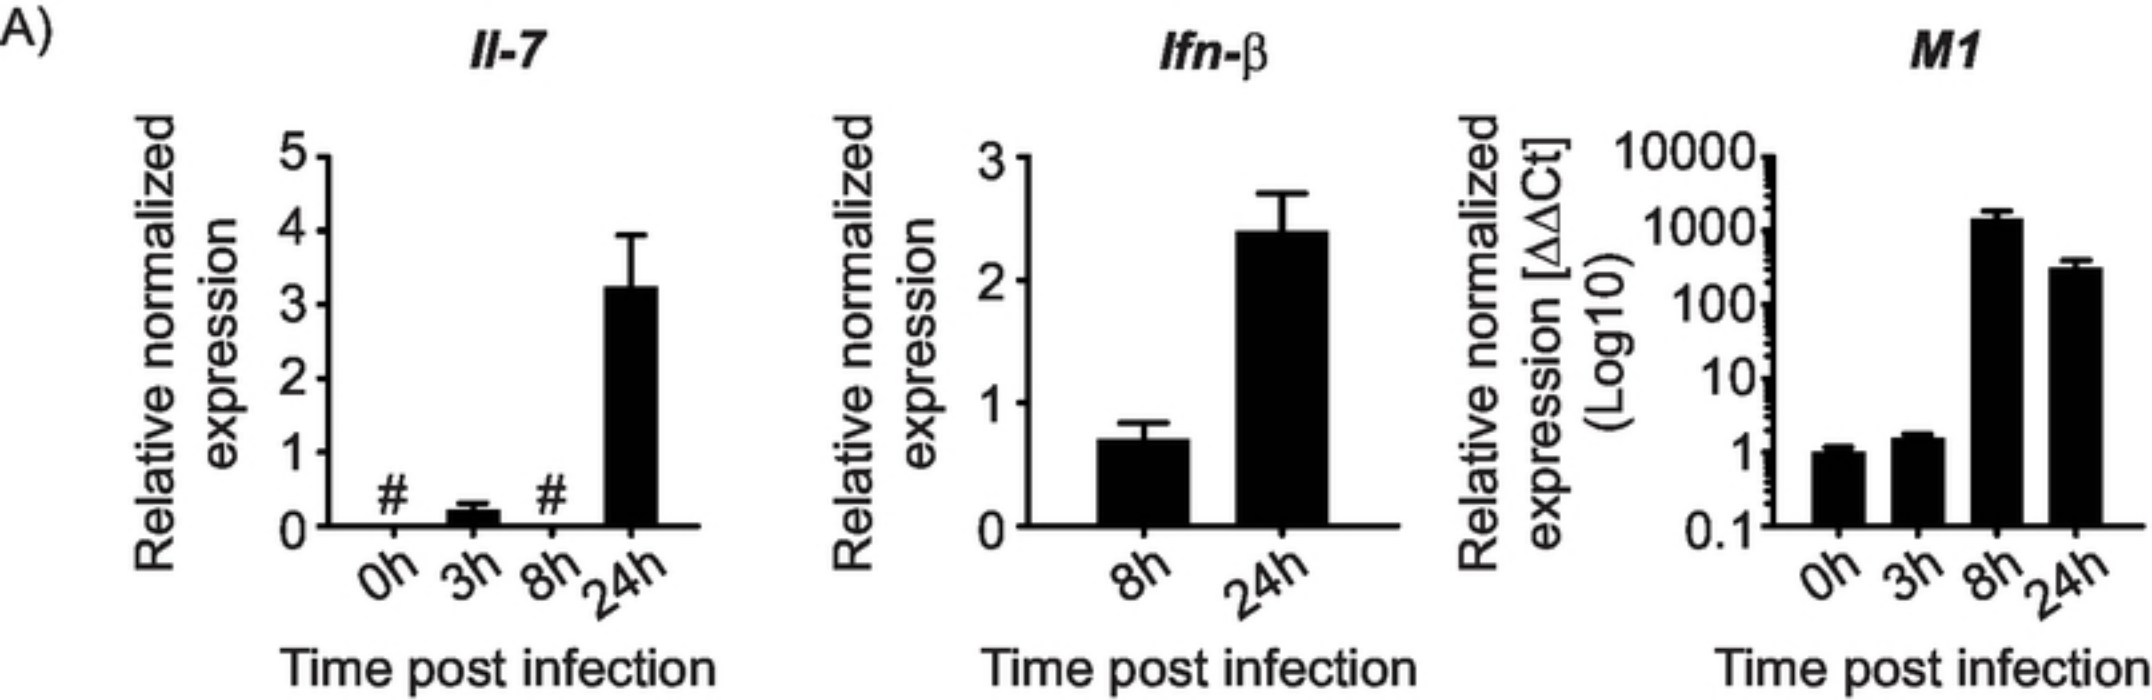

B)

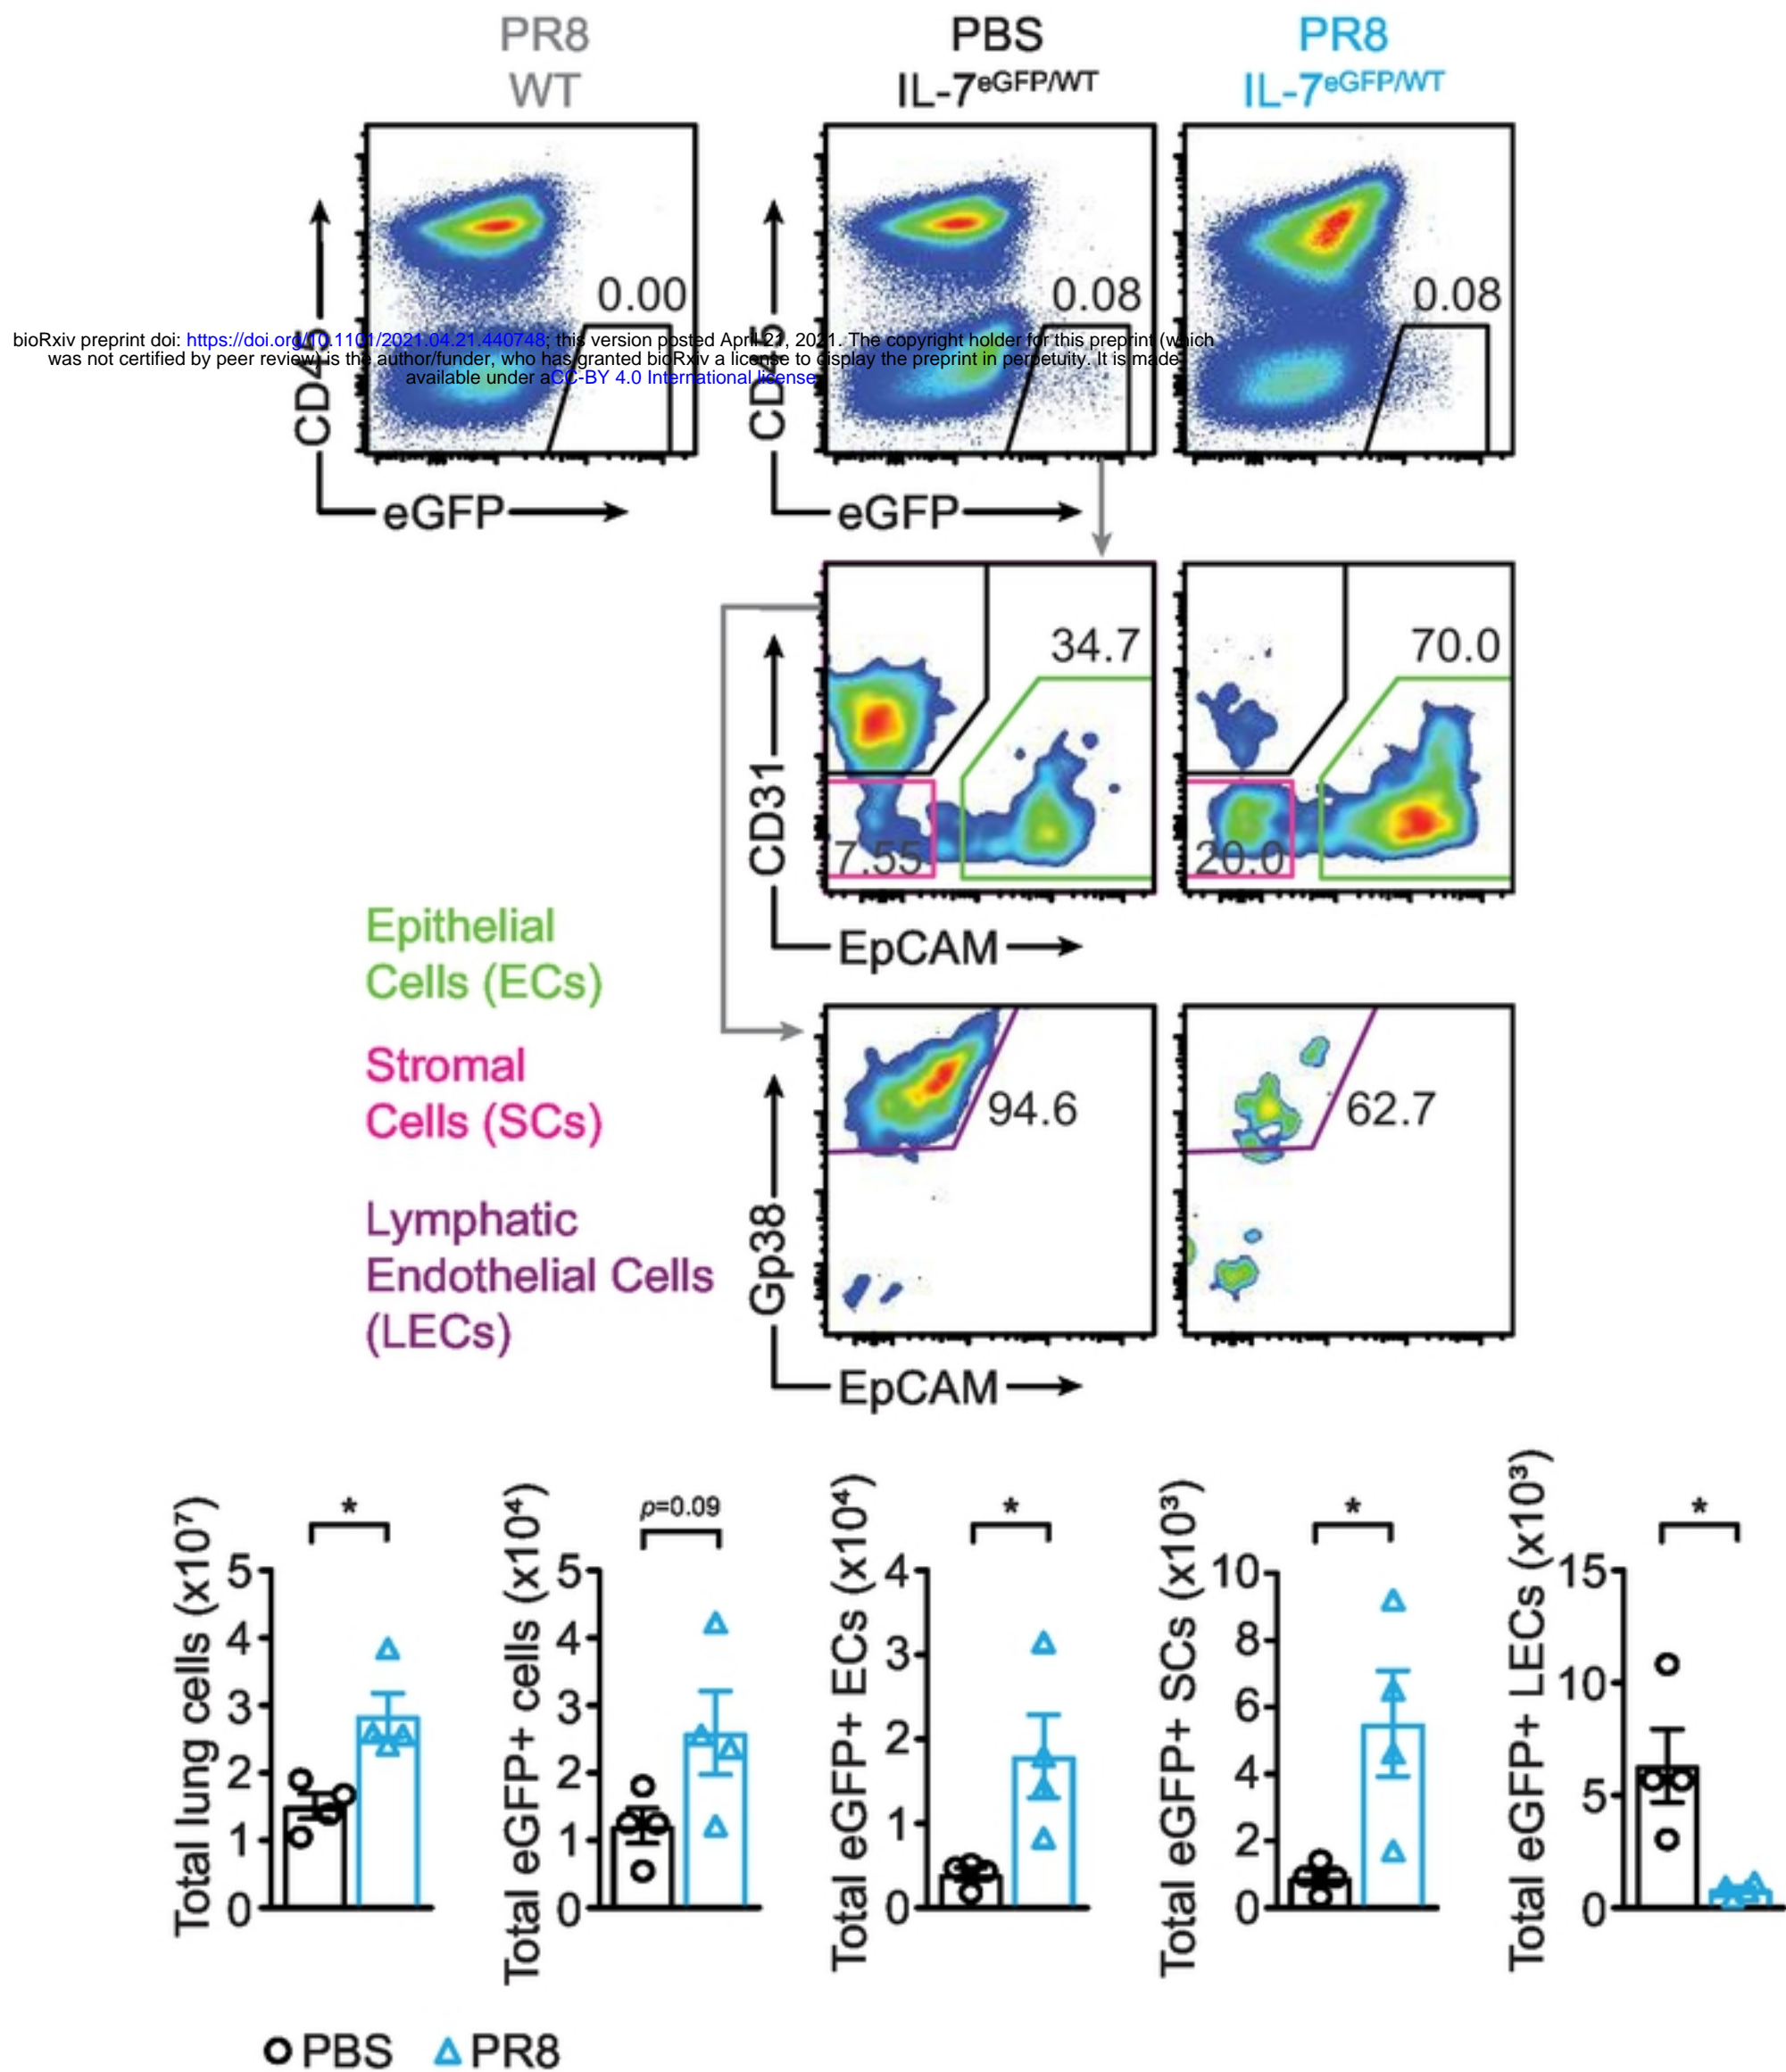

Figure 4



Gated on Live, B220<sup>-</sup>, CD8<sup>+</sup>, CD44<sup>+</sup> Tetramer<sup>+</sup> cells

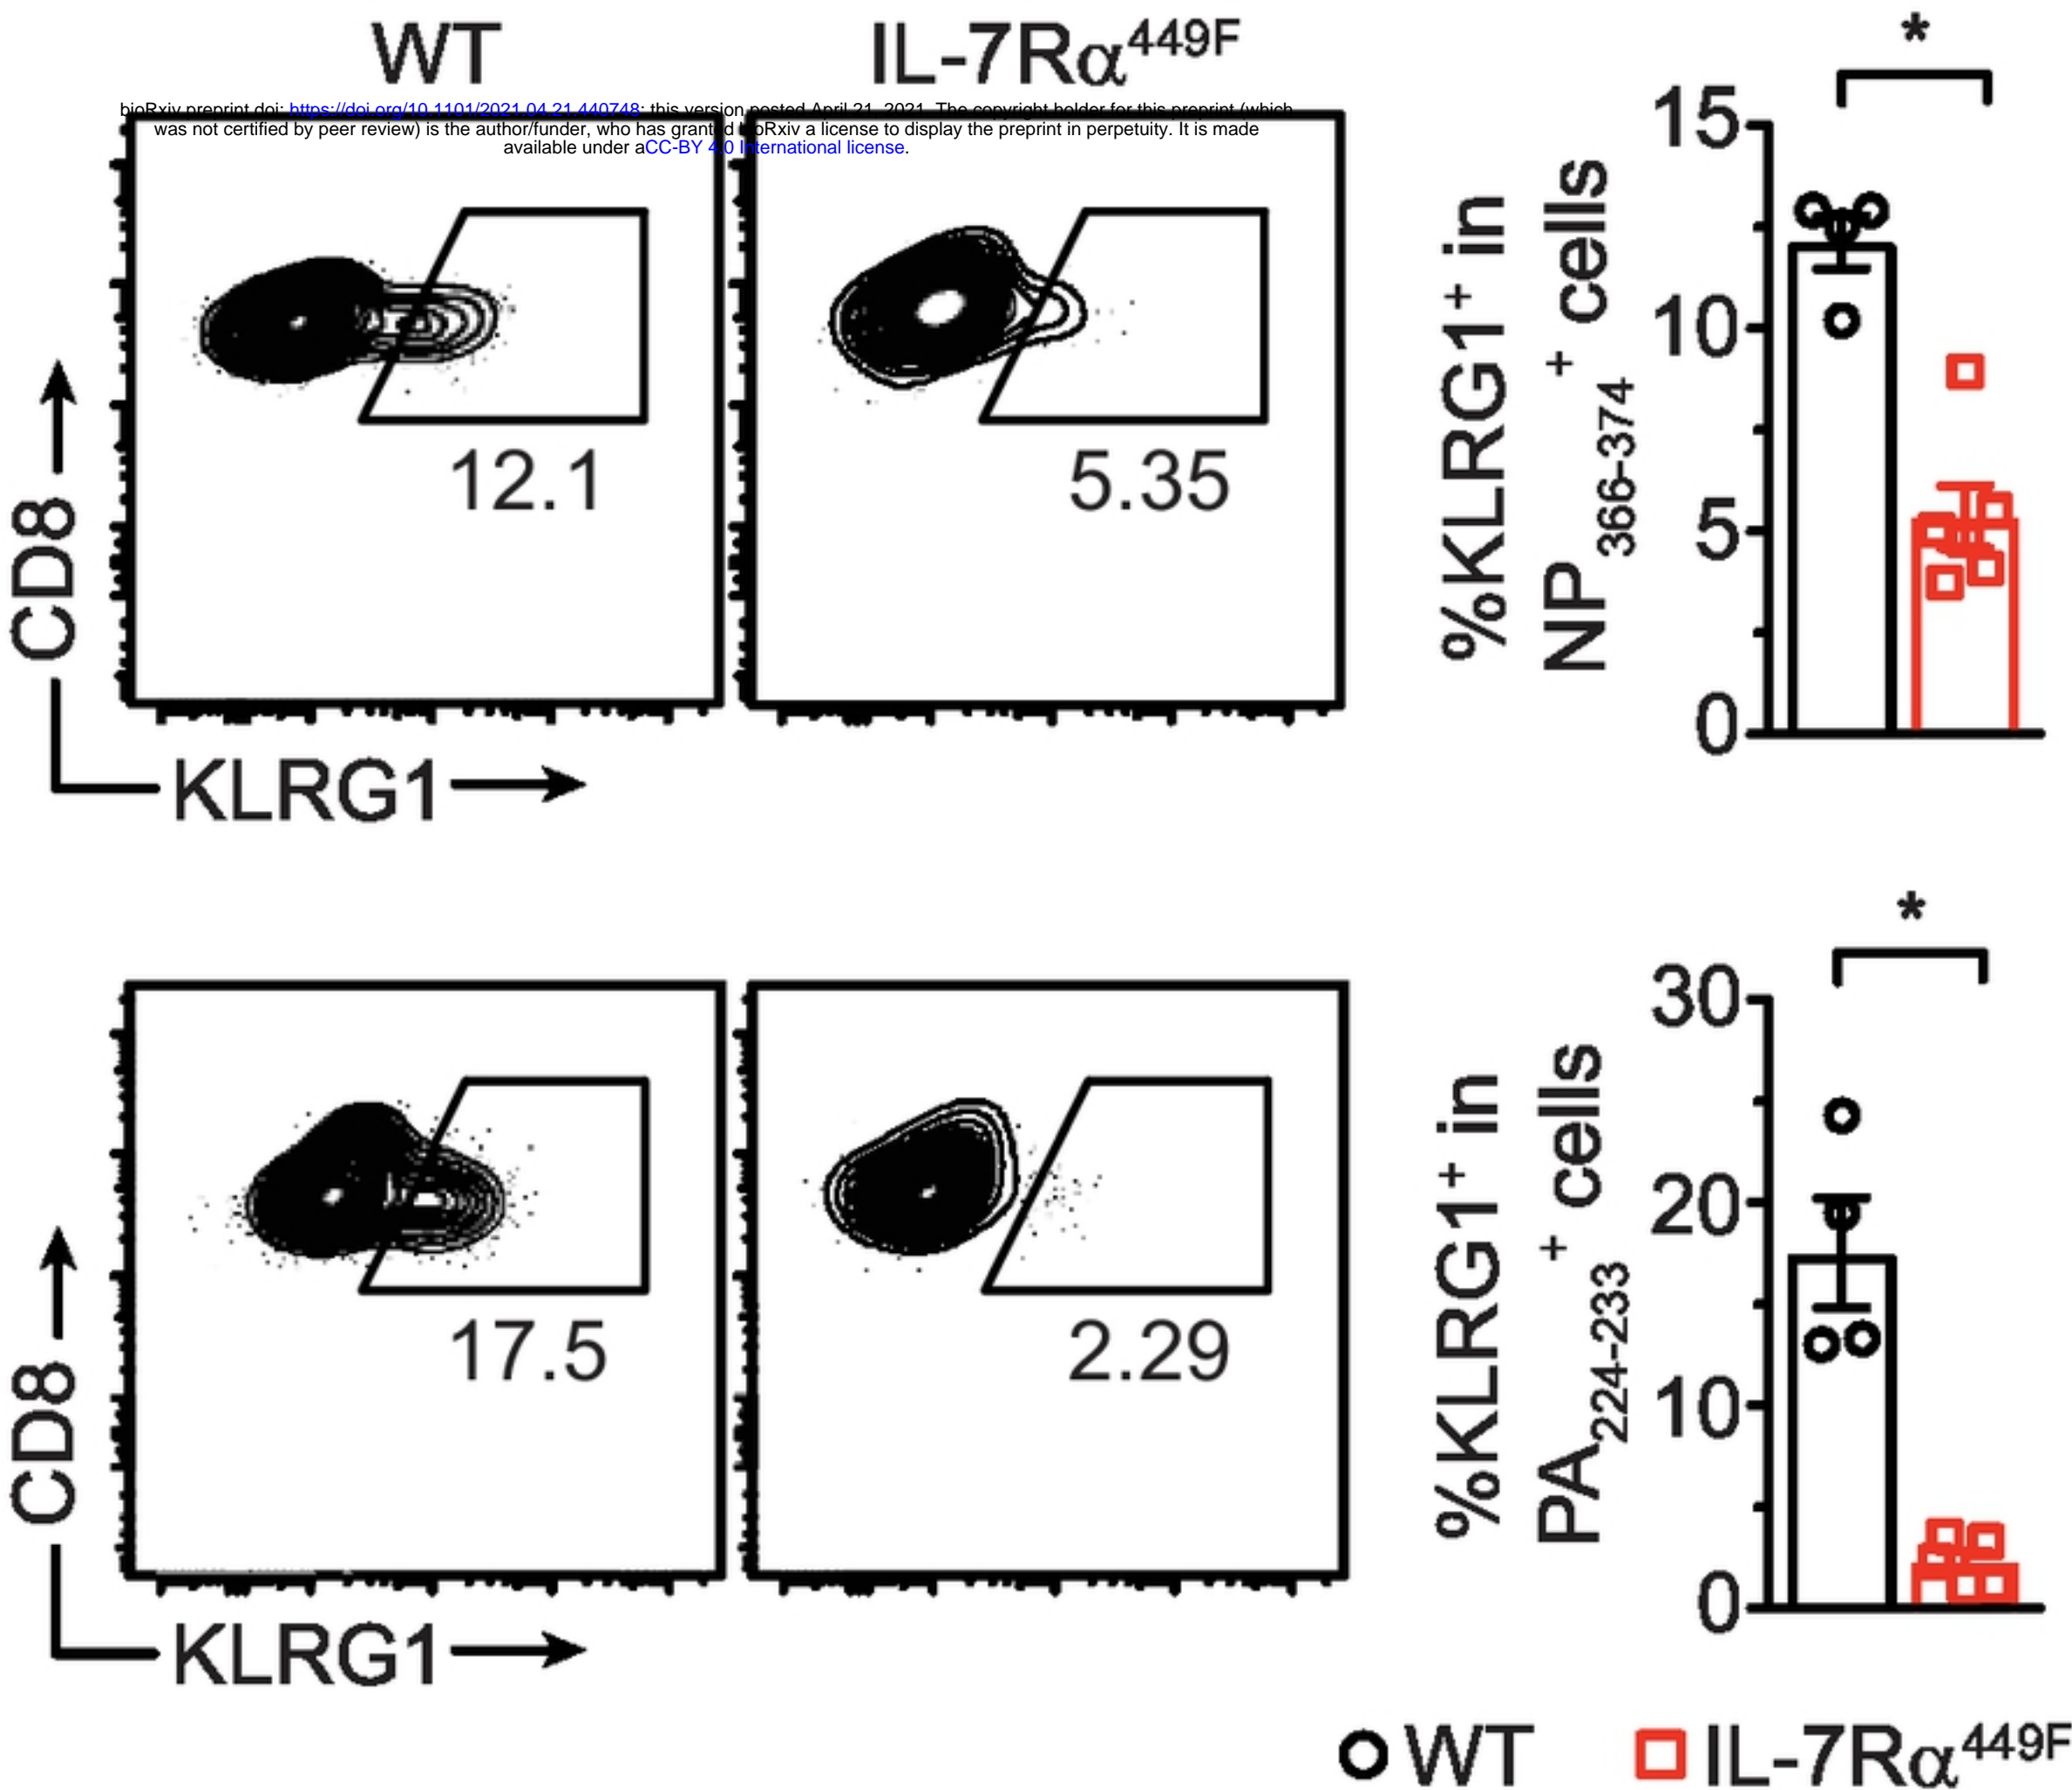

Figure 5

A) Gated on Live, B220<sup>-</sup> cells

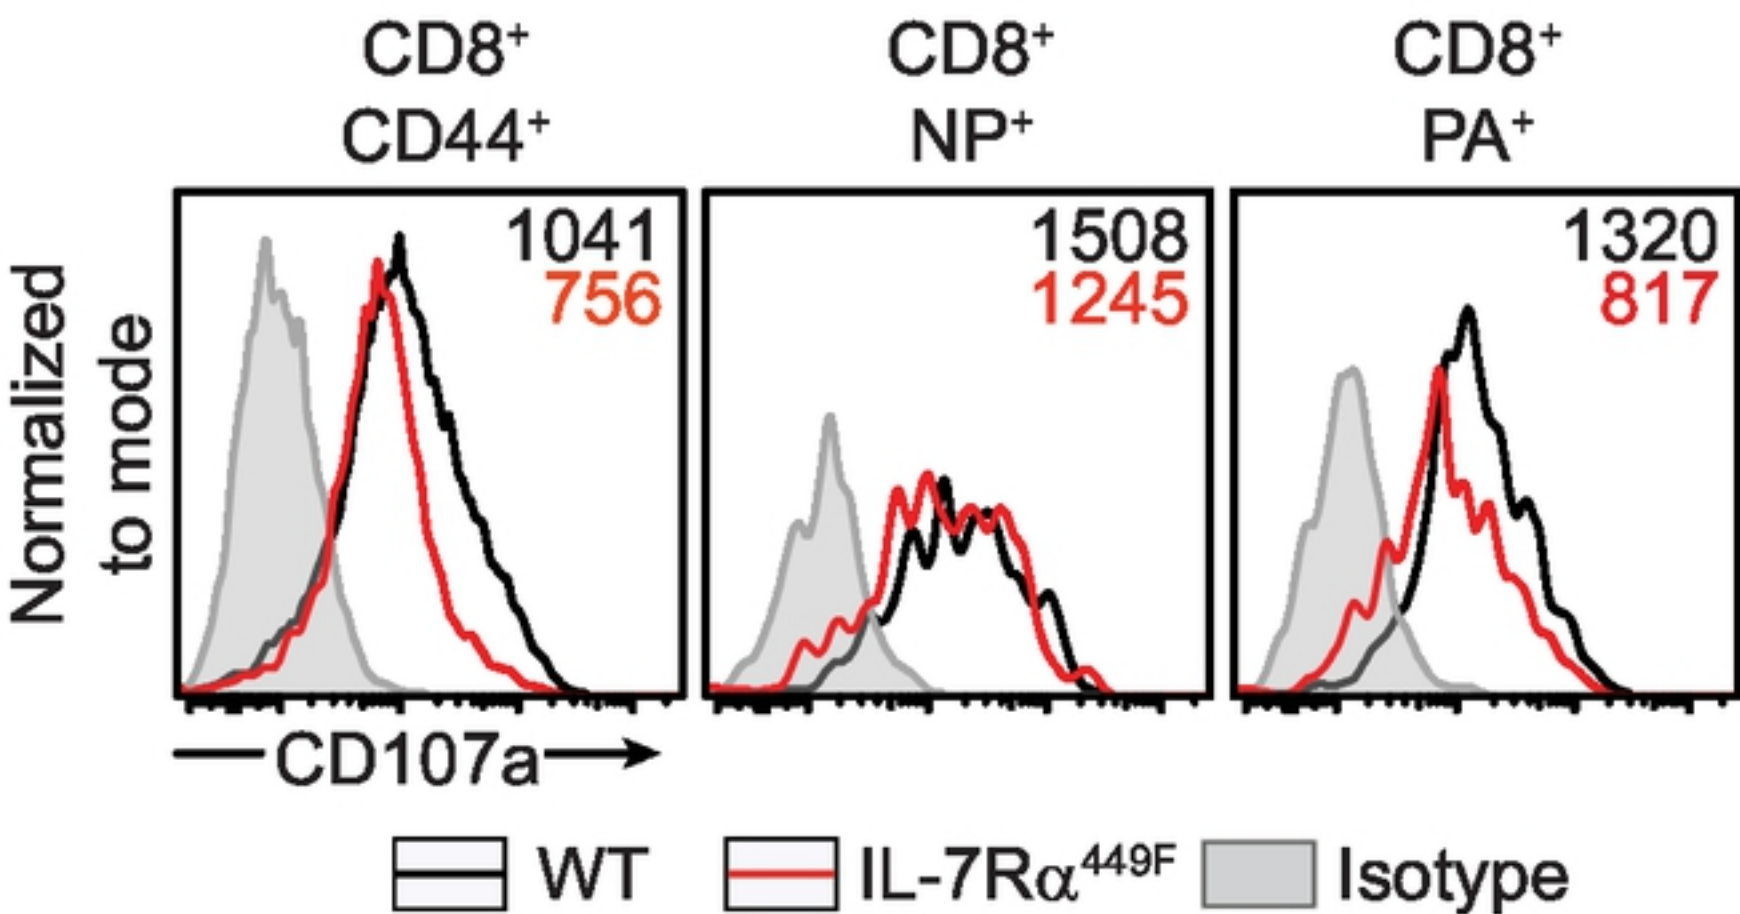

B)

bioRxiv preprint doi: <https://doi.org/10.1101/2021.04.21.440748>; this version posted April 21, 2021. The copyright holder for this preprint (which was not certified by peer review) is the author/funder, who has granted bioRxiv a license to display the preprint in perpetuity. It is made available under aCC-BY 4.0 International license.

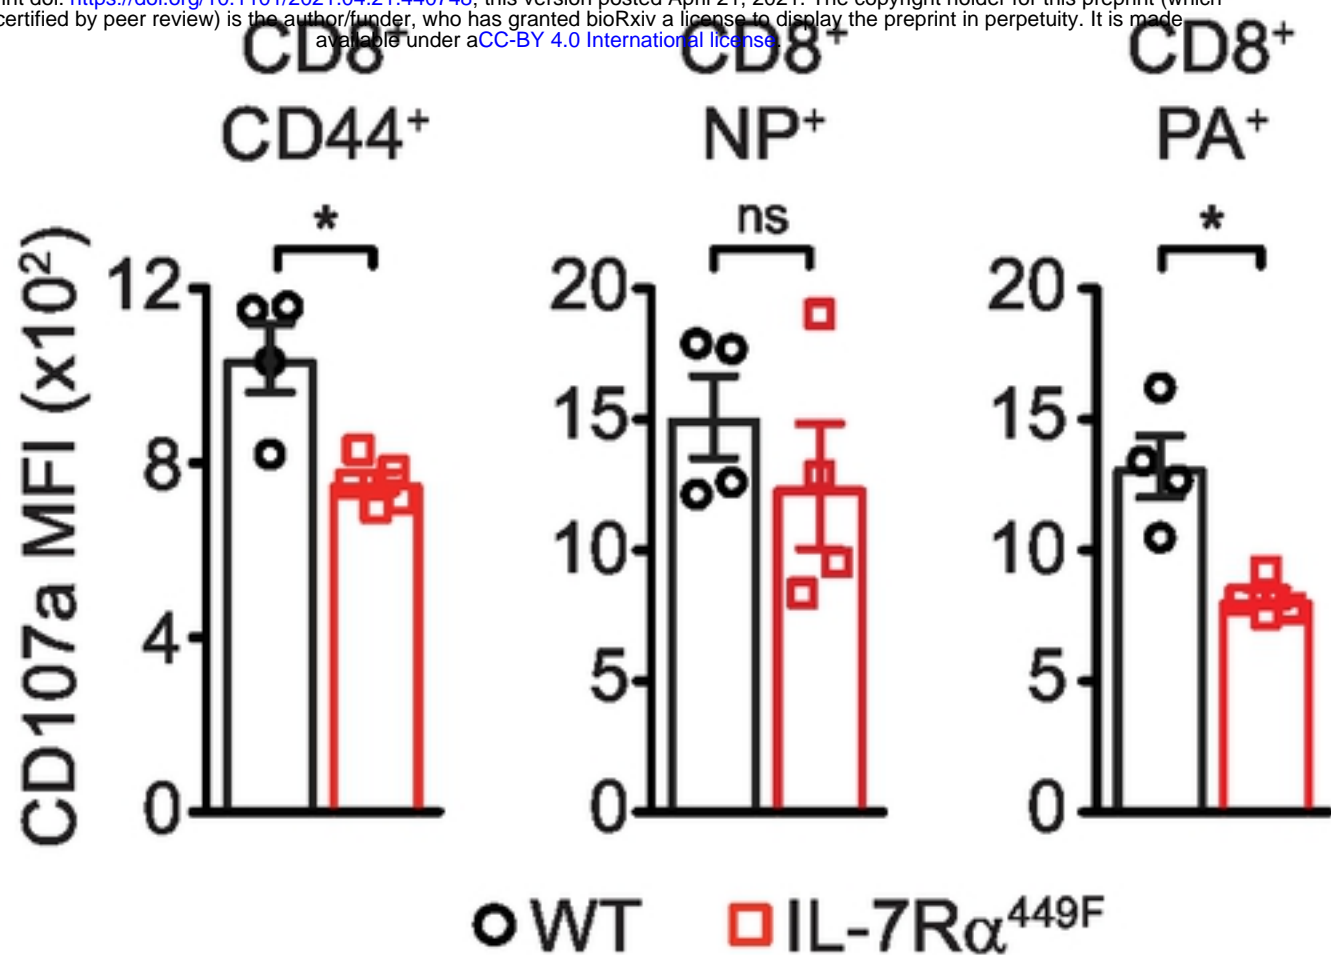

C)

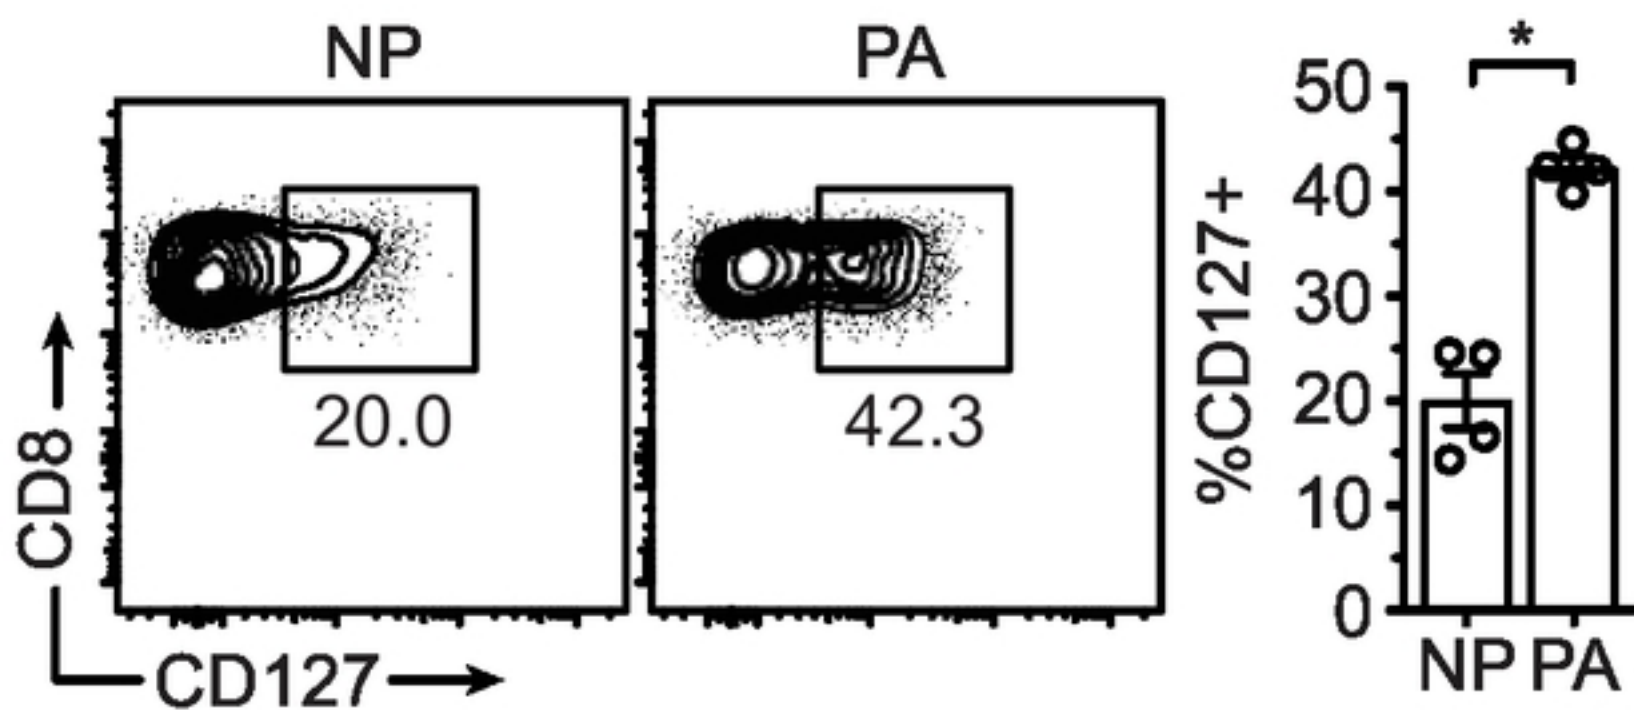

Figure 6

A) Gated on Live, B220<sup>-</sup>, CD8<sup>+</sup>, NP<sub>366-374</sub><sup>+</sup> cells

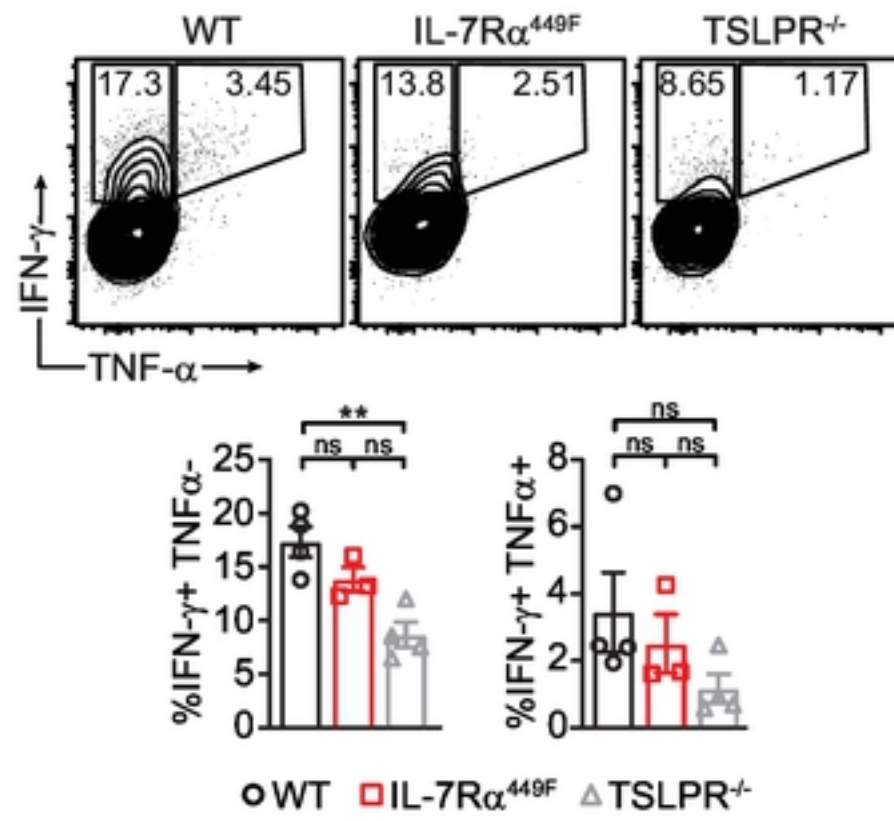

bioRxiv preprint doi: <https://doi.org/10.1101/2021.04.21.440748>; this version posted April 21, 2021. The copyright holder for this preprint (which was not certified by peer review) is the author/funder, who has granted bioRxiv a license to display the preprint in perpetuity. It is made available under aCC-BY 4.0 International license.

B) Gated on Live, B220<sup>-</sup>, CD8<sup>+</sup>, PA<sub>224-233</sub><sup>+</sup> cells

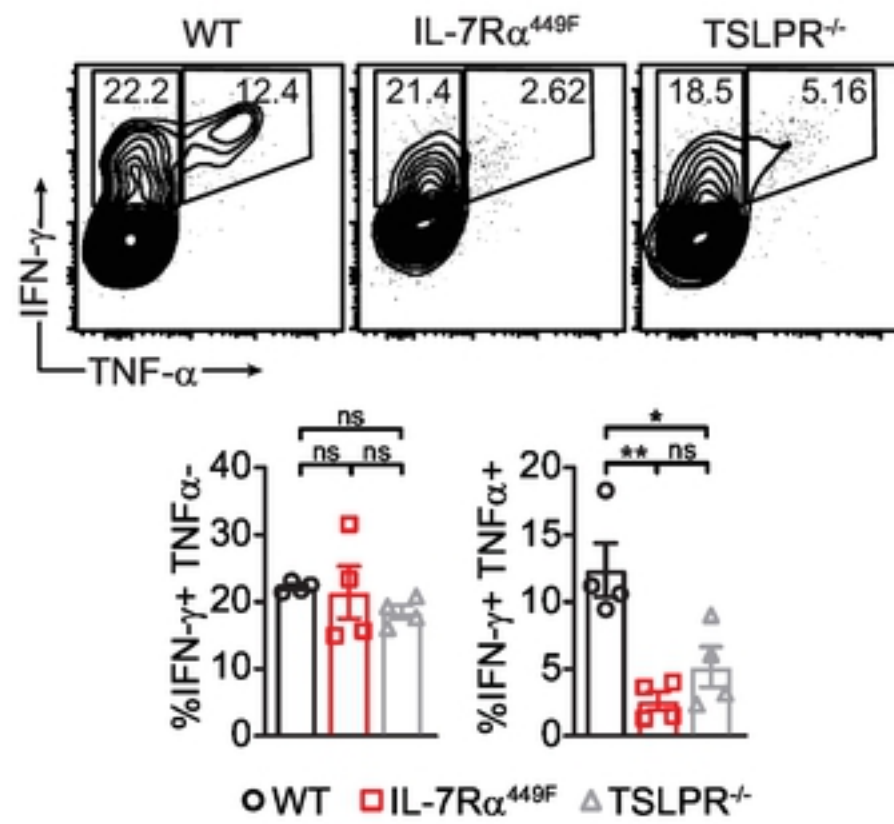



# A) Gated on Live, B220<sup>-</sup>, CD8<sup>+</sup>, NP<sub>366-374</sub><sup>+</sup> cells

bioRxiv preprint doi: <https://doi.org/10.1101/2021.04.21.440748>; this version posted April 21, 2021. The copyright holder for this preprint (which was not certified by peer review) is the author/funder, who has granted bioRxiv a license to display the preprint in perpetuity. It is made available under aCC-BY 4.0 International license.

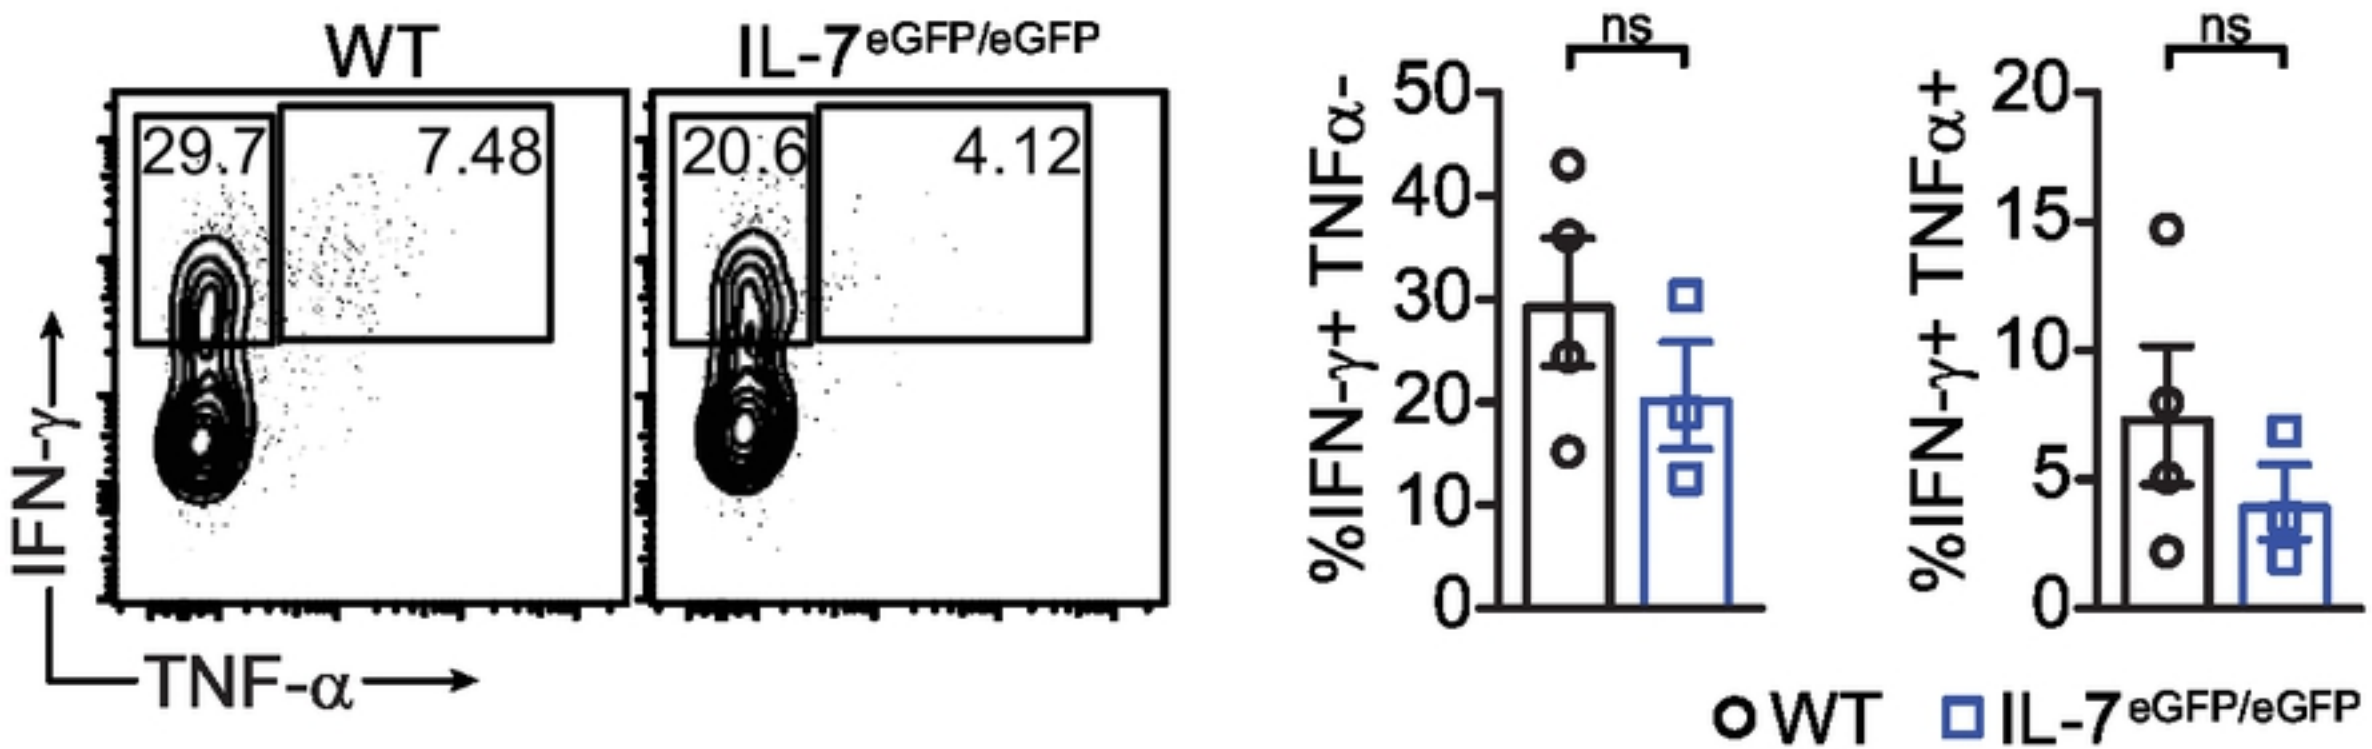

# B) Gated on Live, B220<sup>-</sup>, CD8<sup>+</sup>, PA<sub>224-233</sub><sup>+</sup> cells

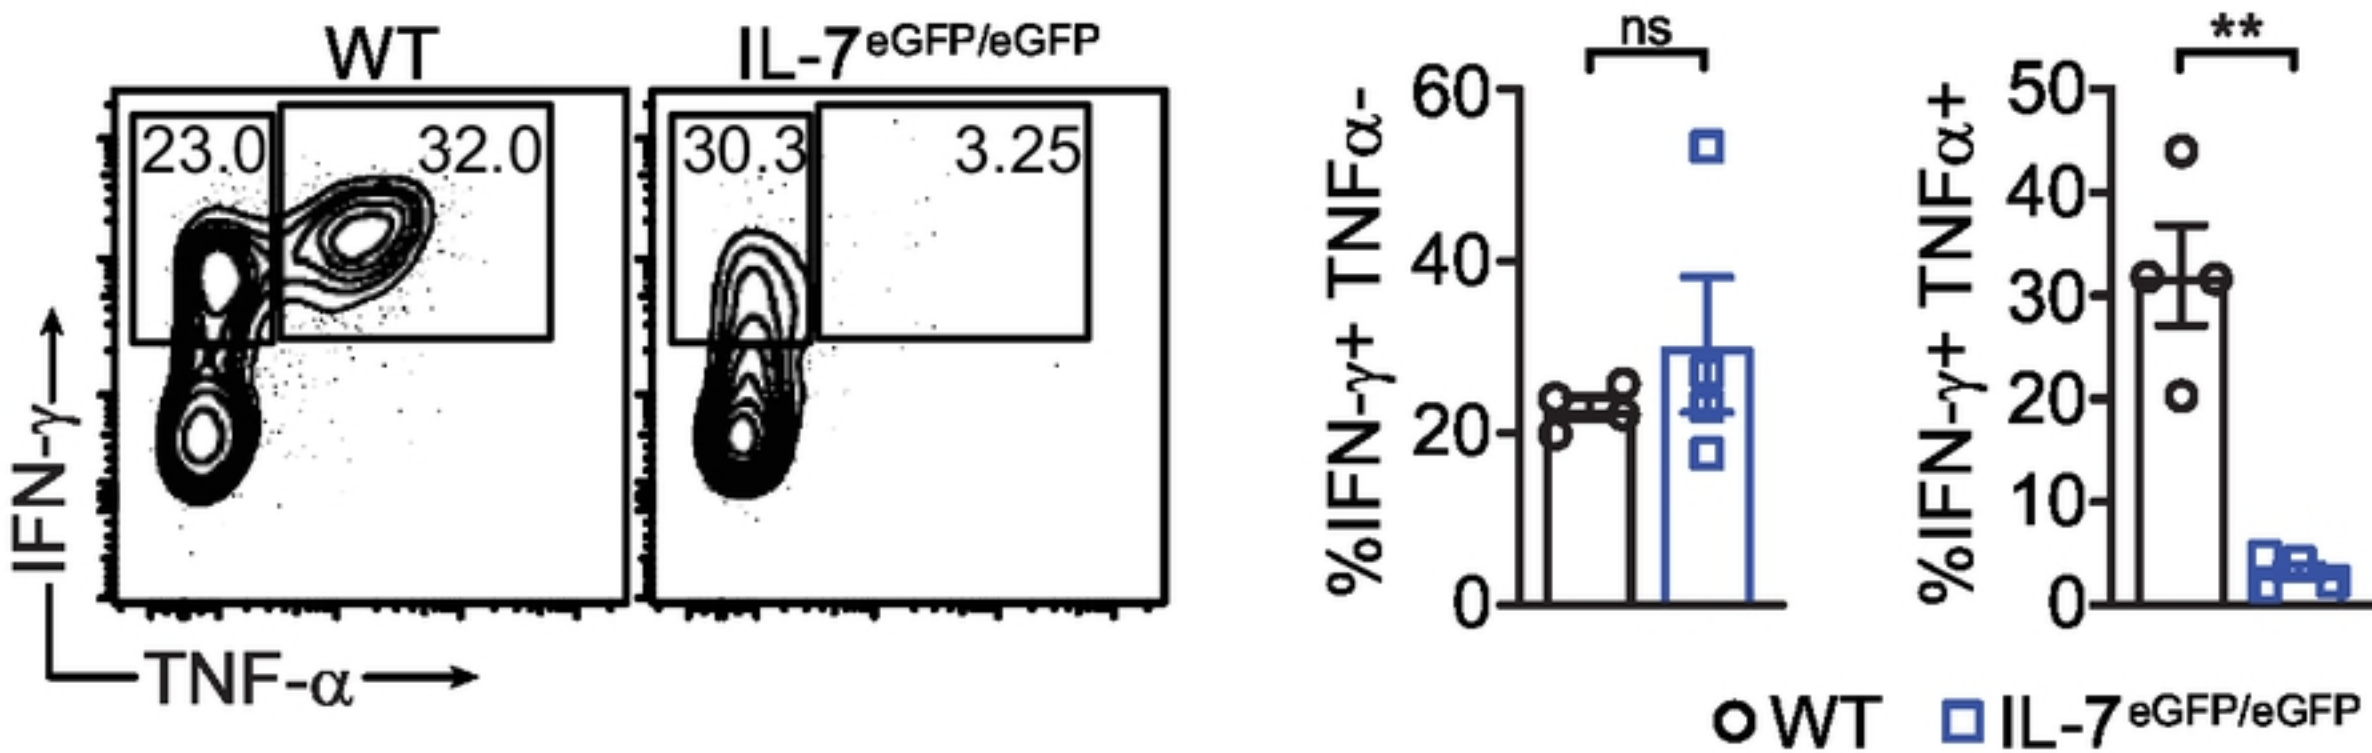

Figure 8

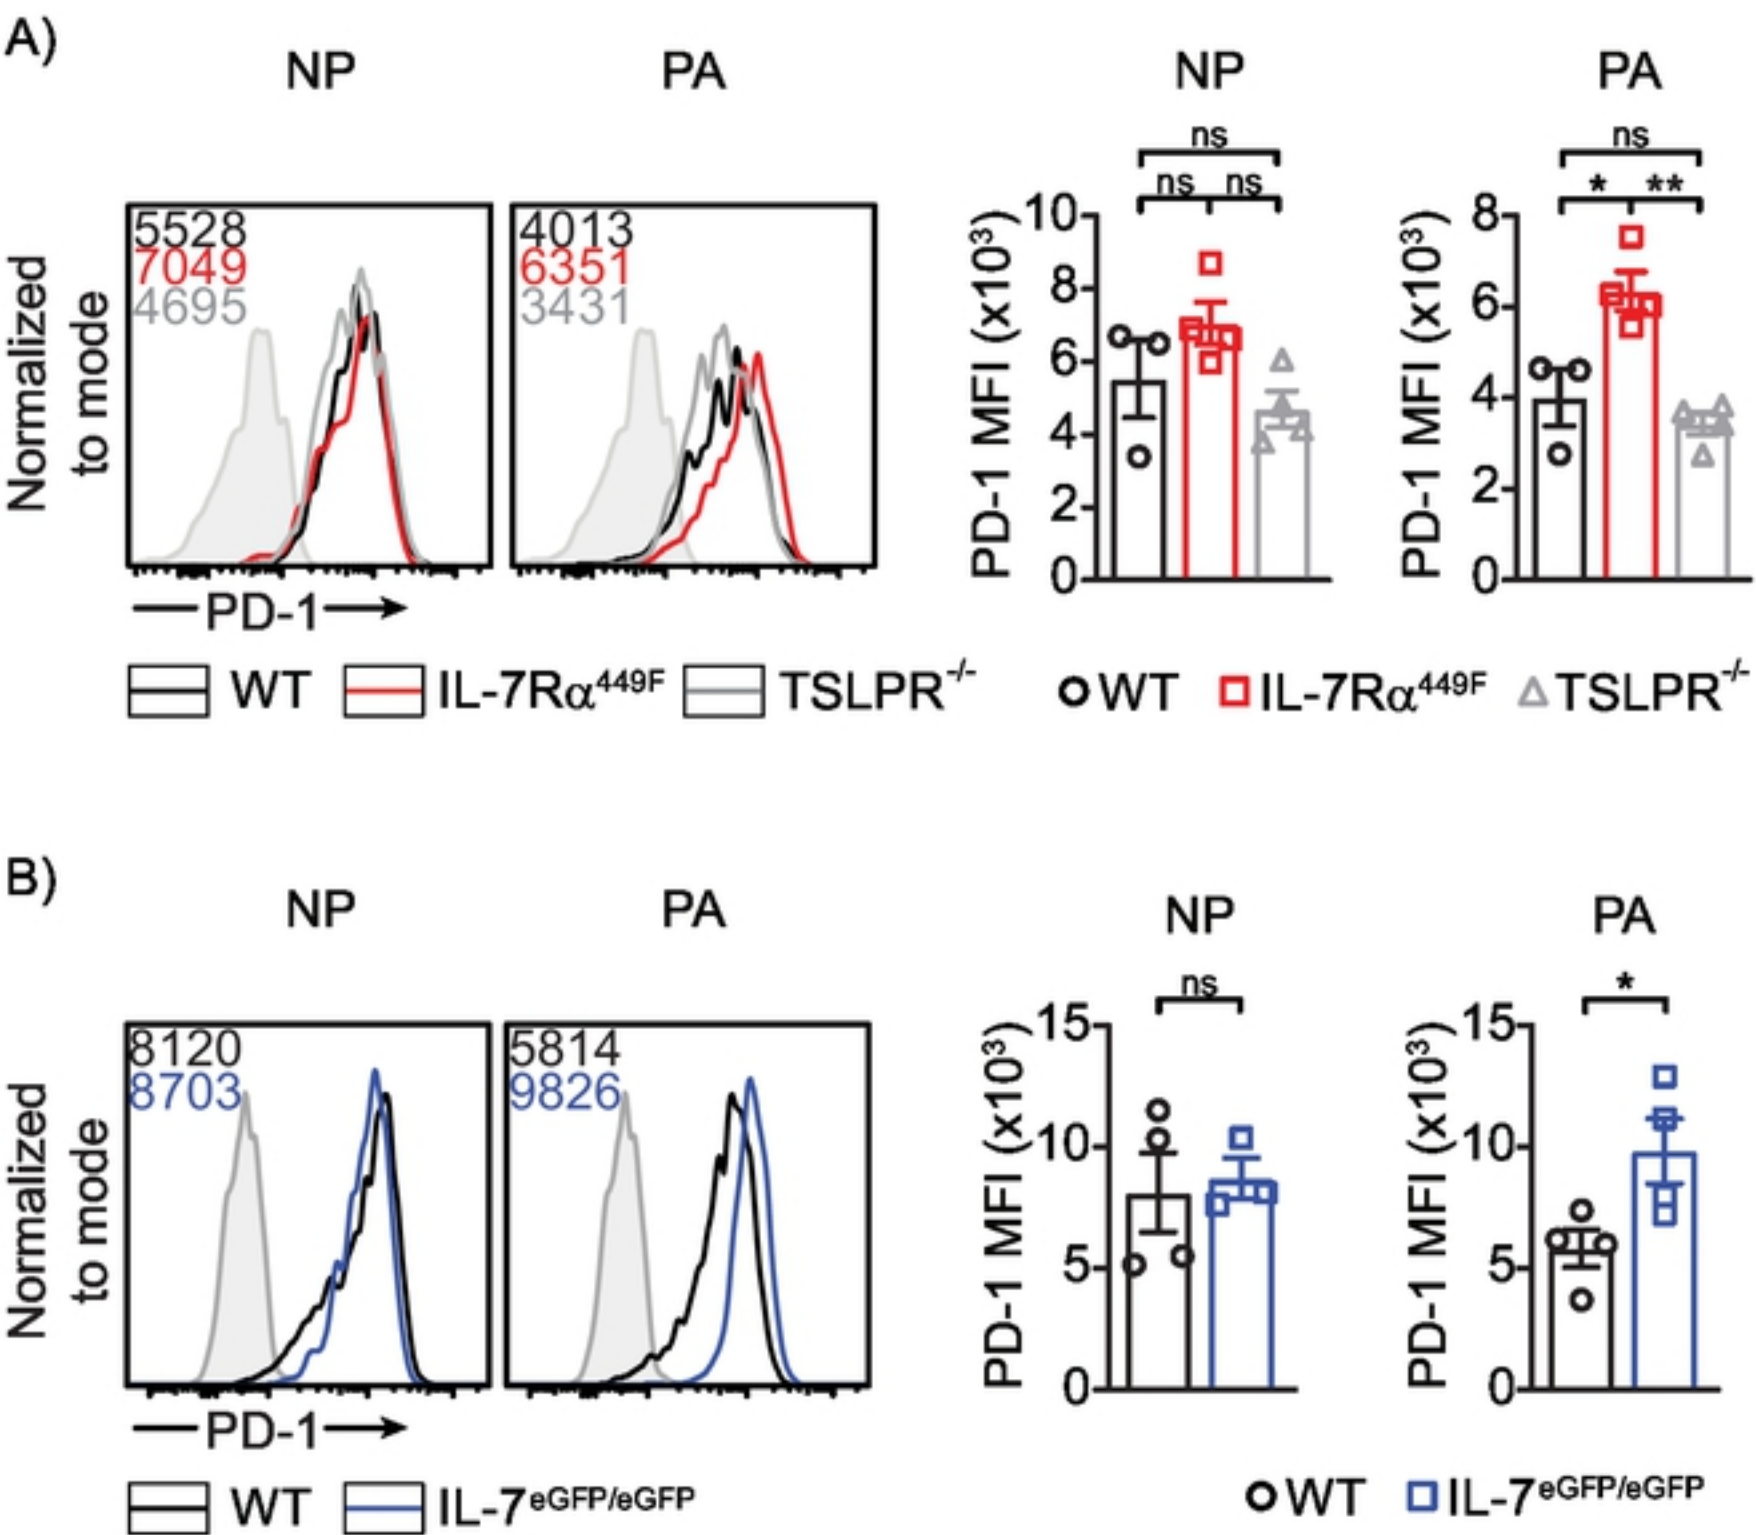

Figure 9
